# Supplementary material for: Structural Setting of the Sixtymile Gold District, Yukon, Canada: Insights into Regional Deformation and Mineralization from Field Mapping and 3D Magnetic Inversion
Source: MDPI journal article supplement (doi:10.3390/min12030291), 2022-02-25
Supplement: s1 [file s1]

## Supporting Information for

# Structural setting of the Sixtymile gold prospect, Yukon, Canada: Insights from field-mapping and 3D magnetic inversion

Jeremy Rimando<sup>1</sup>, Alexander Peace<sup>1</sup>, Meixia Geng<sup>2</sup>, Jaap Verbaas<sup>3</sup> and Harley Slade<sup>3</sup>

<sup>1</sup>School of Earth, Environment and Society, McMaster University, Hamilton, Ontario, Canada

<sup>2</sup>Department of Earth Sciences, Khalifa University of Science and Technology, Abu Dhabi, United Arab Emirates

<sup>3</sup>Flow Metals Corporation, Vancouver, British Columbia, Canada

\* Correspondence: [rimandoj@mcmaster.ca](mailto:rimandoj@mcmaster.ca)

## Contents of this file

Text S1-S4

Figures S1-S36

Tables S1 & S2

## Introduction

This supporting information provides location maps for drillholes and figures showing key hand specimen and thin sections. Data from both diamond and rotary airblast (RAB) drilling (**Figure S1-S9**) were used to augment surface mapping of the geology (**Figure S10-S36**). Along with logs from diamond drilling and rotary airblast (RAB) drilling, hand specimen and thin sections were used to characterize the formations, and corresponding lithologies, in this study.

## Text S1. Upper Devonian to Mississippian Finlayson Group carbonaceous metasedimentary rocks (DMF3)

DDH-11-18 (103.82 m - 106.97 m; **Figs. S1, S3 & S10**), is a medium-grained, quartz-rich quartz muscovite schist. It is worth noting that despite being geographically contained within the DMF3, which includes the Nasina Schist (Yukon Geological Survey (2020), this lithologic description is typically classified by Slade (2020) as Klondike Schist. Logs of the entire interval of core ranging from 103.82 m - 106.97 m describe DDH-11-18 (**Figure S10**) as exhibiting discontinuous stringers of pyrite, quartz veining with blebby arsenopyrite and pyrite, minor sphalerite. Alteration includes siliceous zones

and sericitization along with local/minor kaolinite and limonite on fracture surfaces. Structures observed include undulating foliation and foliation-parallel quartz veins.

#### **Text S2. Middle to Late Permian Klondike Schist (PK2)**

DDH-11-15 (**Figs. S1, S3 & S11-S15**), and DDH-11-20 (**Figs. S1, S5, 16 & 17**), are generally strongly foliated, fine- to coarse-grained muscovite quartz schists, including varying amounts of chlorite and biotite. Logs of the entire interval of core of DDH-11-15 ranging from 194.97 m to 199.30 m (**Figure S1, S3 & S11**) and 224.9 m to 233.33 m (**Figs. S1, S3 & S11-S15**) are described in drill reports as exhibiting visible gold (2-3mm sized gold specs within a quartz vein between 229.38m - 229.4 m), blebby arsenopyrite, and stringers/veins of pyrite and hematite. Alteration includes pervasive silicification, sericitization and chloritization. Core logs describe DDH-11-20 (166.10 m - 170.14 m; **Figs. S1, S5, 16 & 17**) as having quartz- and quartz-carbonate veins with pyrite  $\pm$  hematite.

#### **Text S3. Upper Devonian to Mississippian Finlayson Group intermediate to mafic volcanic and volcanoclastic rocks, and fine-grained amphibolite and greenstone (DMF1)**

DDH-11-01 (**Figs. S1, S2 & S18**), DDH-11-02 (**Figs. S1, S2, S19 & S20**), and DDH-11-10 (**Figs. S1, S2, S21 & S22**) are generally medium-grained schists, with variety of compositions. DDH-11-01 (165.51 m - 169.65 m; **Figs. S1, S2 & S18**) is a feldspar-biotite-amphibole-quartz schist with blebby and fracture-fill pyrite, which exhibits pervasive sericitization. DDH-11-02 (130.67 m - 135.05 m; **Figs. S1, S2, S19 & S20**), and DDH-11-02 (135.05 m - 139.34 m; **Figs. S1, S2, S19 & S20**) are chlorite-mica schists with blebby, disseminated, stringer/vein-related, and fracture-fill pyrite, which exhibit pervasive propylitic alteration and fracture related oxidation. DDH-11-02 exhibits strong foliation with minor quartz augens and localized crenulation cleavage. DDH-11-10 (247.69 m - 251.34 m; **Figs. S1, S2, S21 & S22**) is a quartz-biotite schist with disseminated hematite, and both stringer/vein-related

and disseminated pyrite, which exhibits pervasive silicification, fracture-related argillization, and overprints of chloritization and oxide alteration.

#### **Text S4. Upper Cretaceous Carmacks Group**

DDH-11-03 (Figs. S1, S2 & S23-S25), DDH-11-05 (Figs. S1, S2, S26 & S27), DDH-11-07 (Figs. S1, S2 & S28-S30), DDH-11-08 (Figs. S1, S2, S31 & S32), DDH-11-16 (Figs. S1, S2, S33 & S34), and DDH-11-17 (Figs. S1, S2, S35 & S36) are generally fine- to coarse-grained porphyritic andesites which are mostly highly fractured, and locally brecciated. Fault and flow breccia was observed in DDH-11-16 (Figs. S1, S2, S33 & S34), while hydrothermal breccia was observed in DDH-11-07 (Figs. S1, S2 & S28-S30) and DDH-11-08 (Figs. S1, S2, S31 & S32). Core logs generally describe these samples as exhibiting mostly fracture-fill, disseminated, and stringer/vein-related pyrite; rarely containing hematite and galena. A wide variety of alteration can be observed in the porphyritic andesites of the Upper Cretaceous Carmacks Group, including localized-to-pervasive sericitization (DDH-11-03: Figs. S1, S2 & S23-S25; DDH-11-17: Figs. S1, S2, S35 & S36), pervasive silicification (DDH-11-05; Figs. S1, S2 & S26-S27), fracture-related silicification (DDH-11-07; Figs. S1, S2 & S28-S30), overprinted silicification (DDH-11-07: Figs. S1, S2 & S28-S30; DDH-11-08: Figs. S1, S2, S31 & S32; and DDH-11-17: Figs. S1, S2, S35 & S36) potassic alteration DDH-11-03 (Figs. S1, S2 & S23-S25), argillization (DDH-11-16: Figs. S1, S2, S33 & S34; and DDH-11-17: Figs. S1, S2, S35 & S36), oxidation (DDH-11-16; Figs. S1, S2, S33 & S34). Quartz and dolomite veins were documented in DDH-11-08 (Figs. S1, S2, S31 & S32), while calcite veins were observed in DDH-11-16 (Figs. S1, S2, S33 & S34). Remarkably, DDH-11-17 (Figs. S1, S2, S35 & S36) exhibits a slightly schistose texture.

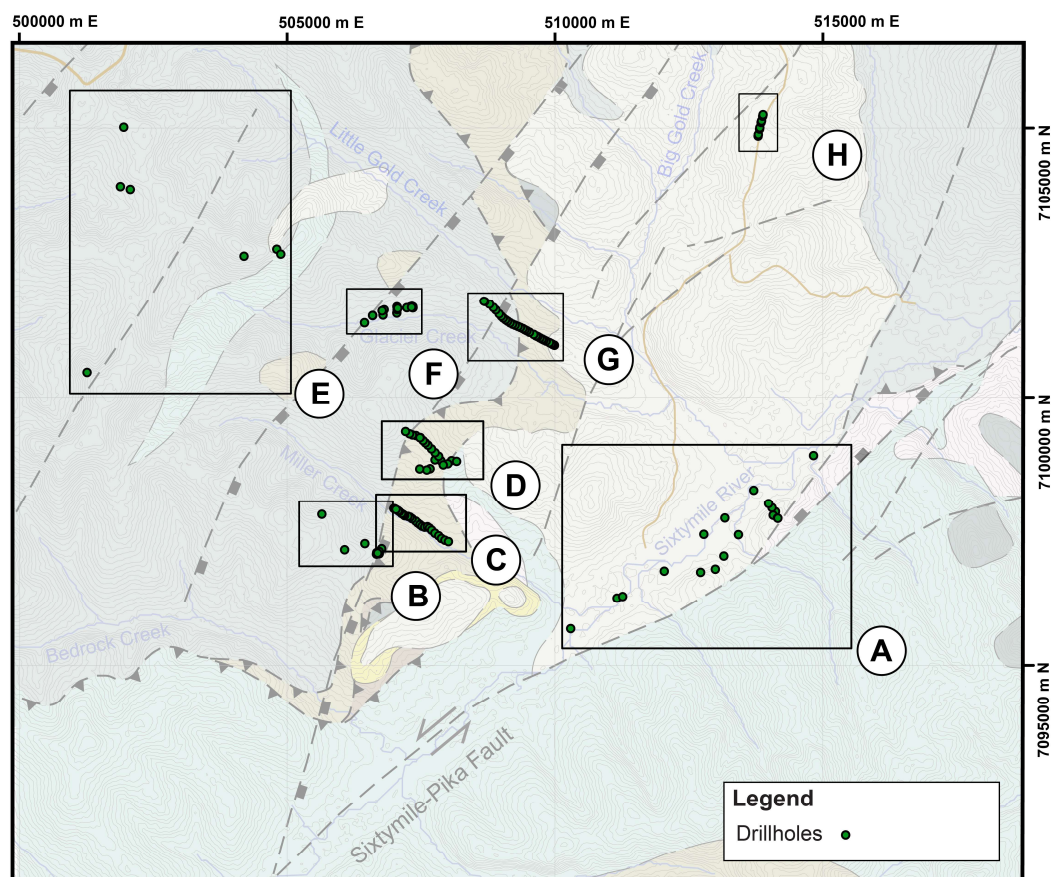

**Figure S1. Drillhole location map.** Boxes A-H correspond to larger scale drillhole location maps (Appendix Figs. S2-S9).

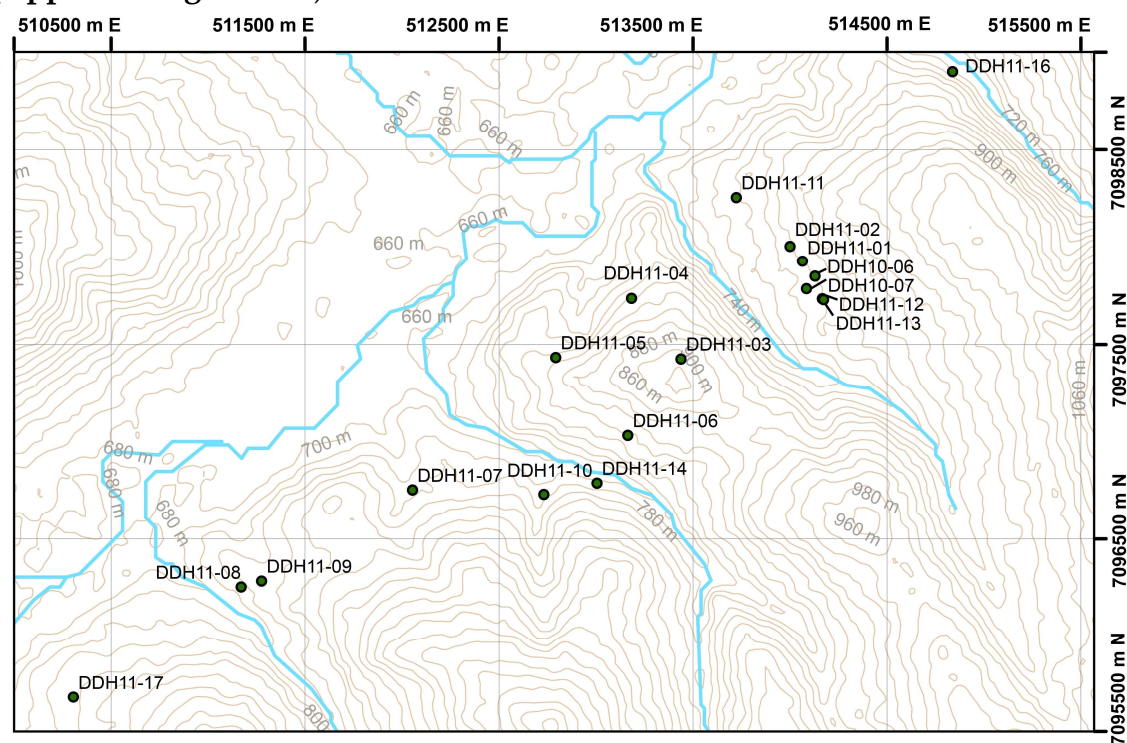

**Figure S2. Drillhole location map A.** Refer to Supplementary Figure S1. for this map's location within the Sixtymile District.



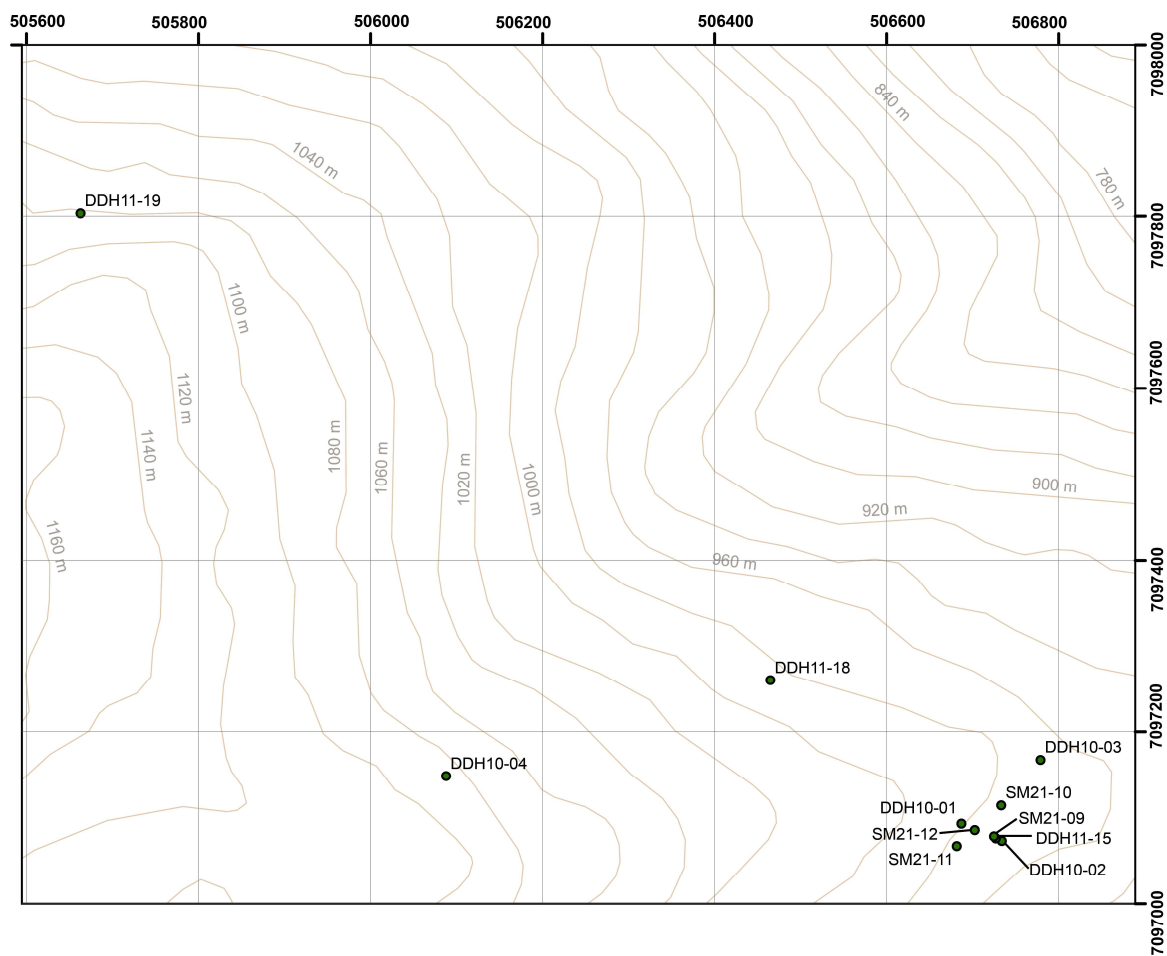

**Figure S3.** Drillhole location map B. Refer to Supplementary Figure S1. for this map's location within the Sixtymile District.

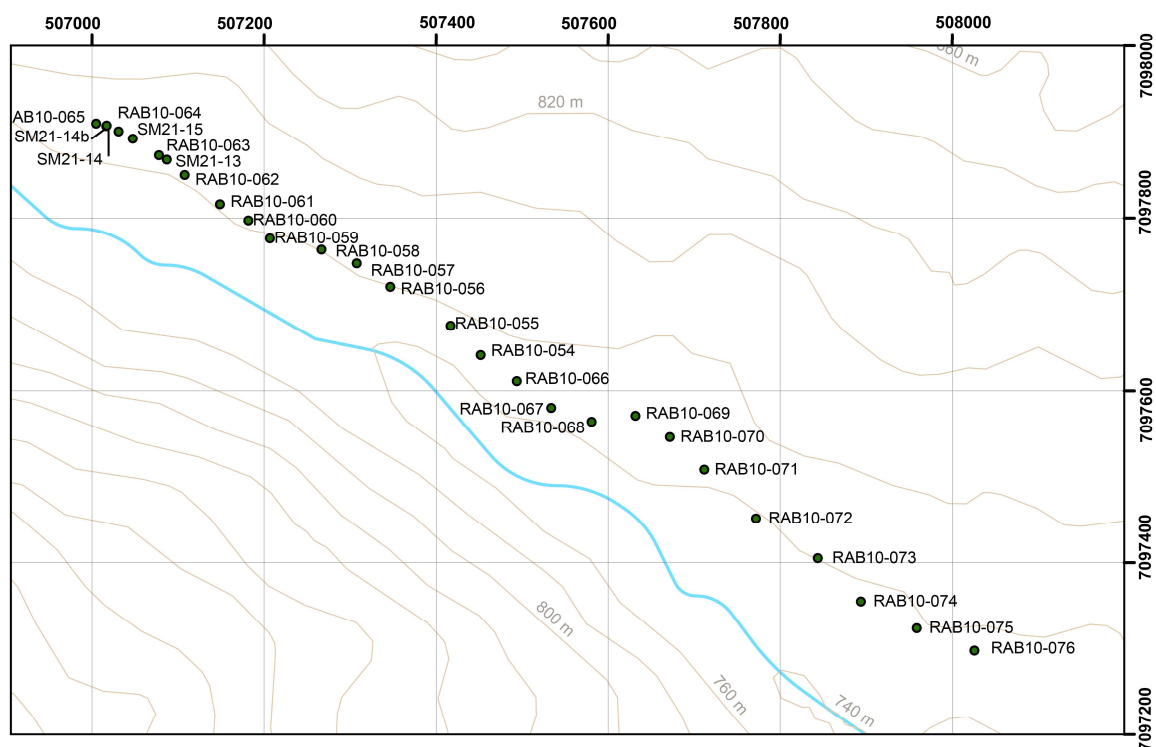

**Figure S4.** Drillhole location map C. Refer to Supplementary Figure S1. for this map's location within the Sixtymile District.

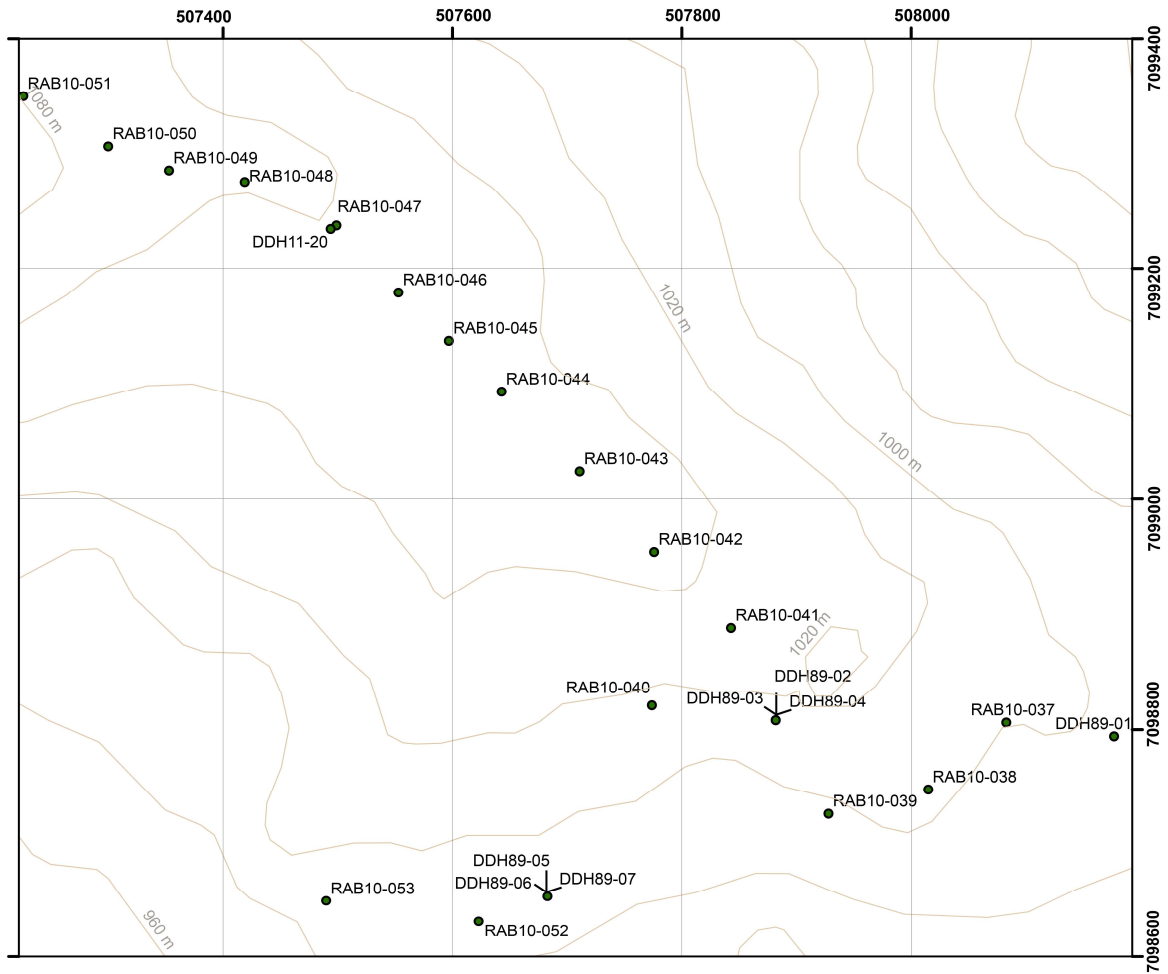

**Figure S5.** Drillhole location map D. Refer to Supplementary Figure S1. for this map's location within the Sixtymile District.

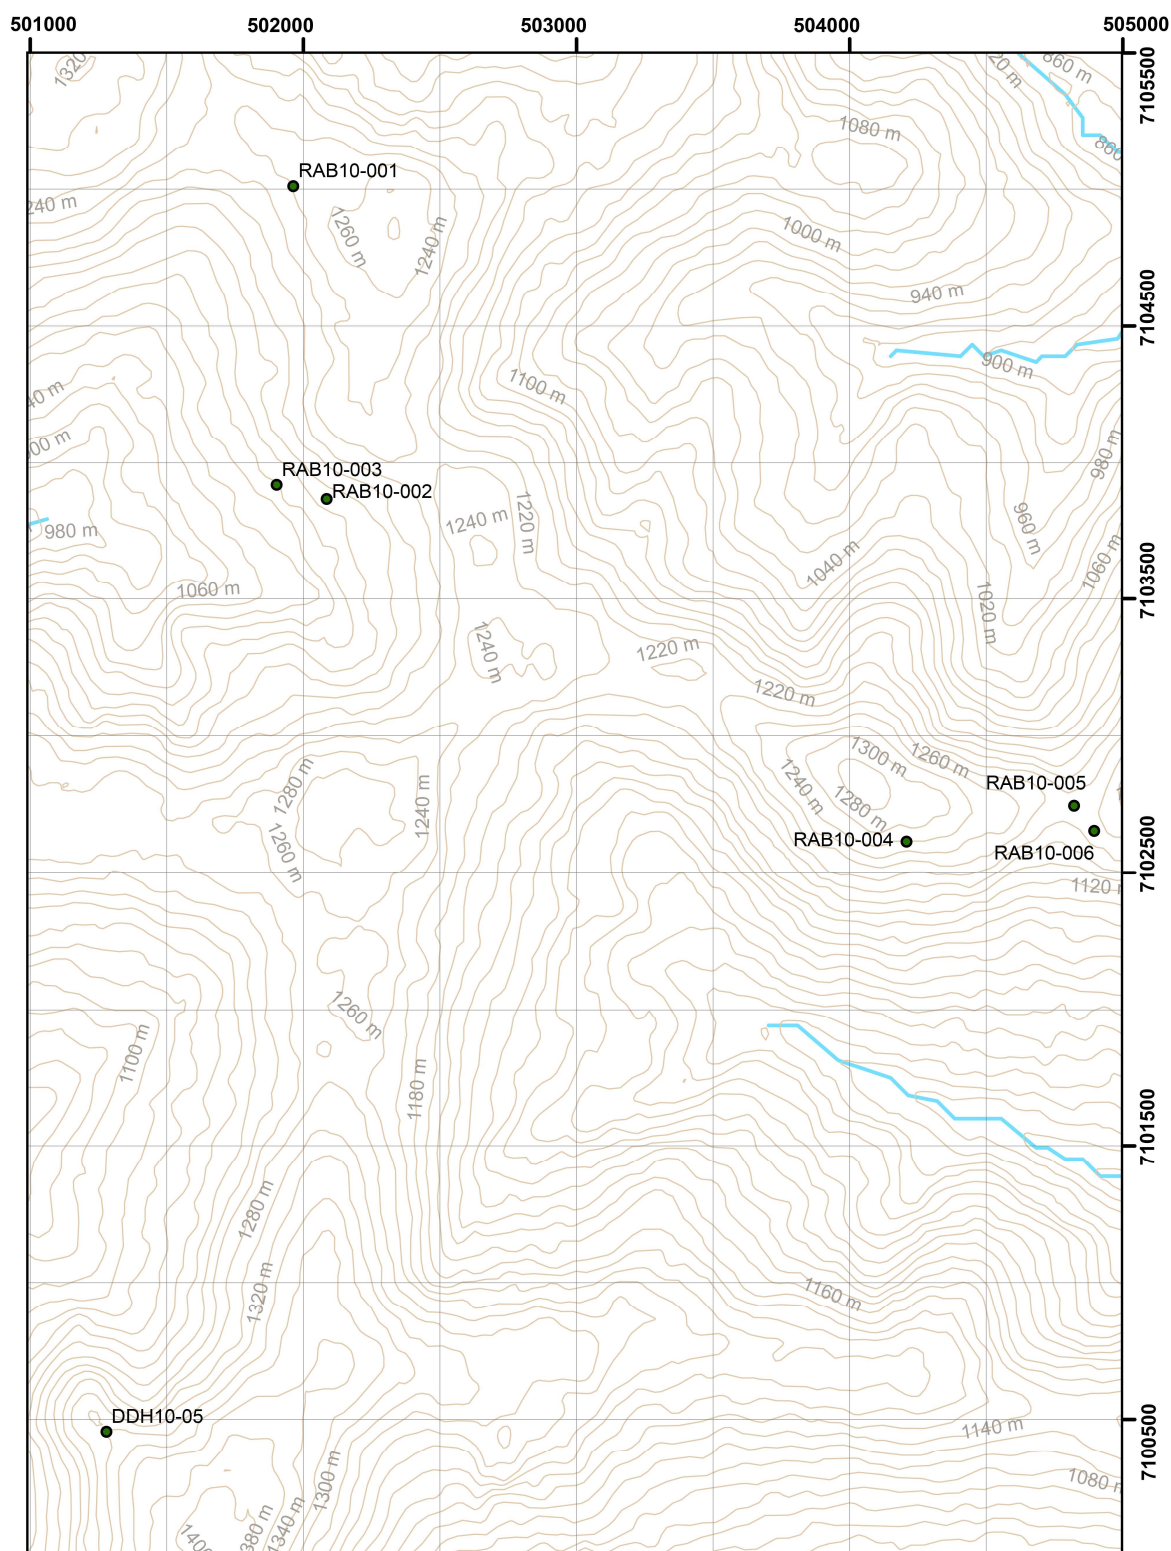

**Figure S6.** Drillhole location map E. Refer to Supplementary Figure S1. for this map's location within the Sixtymile District.

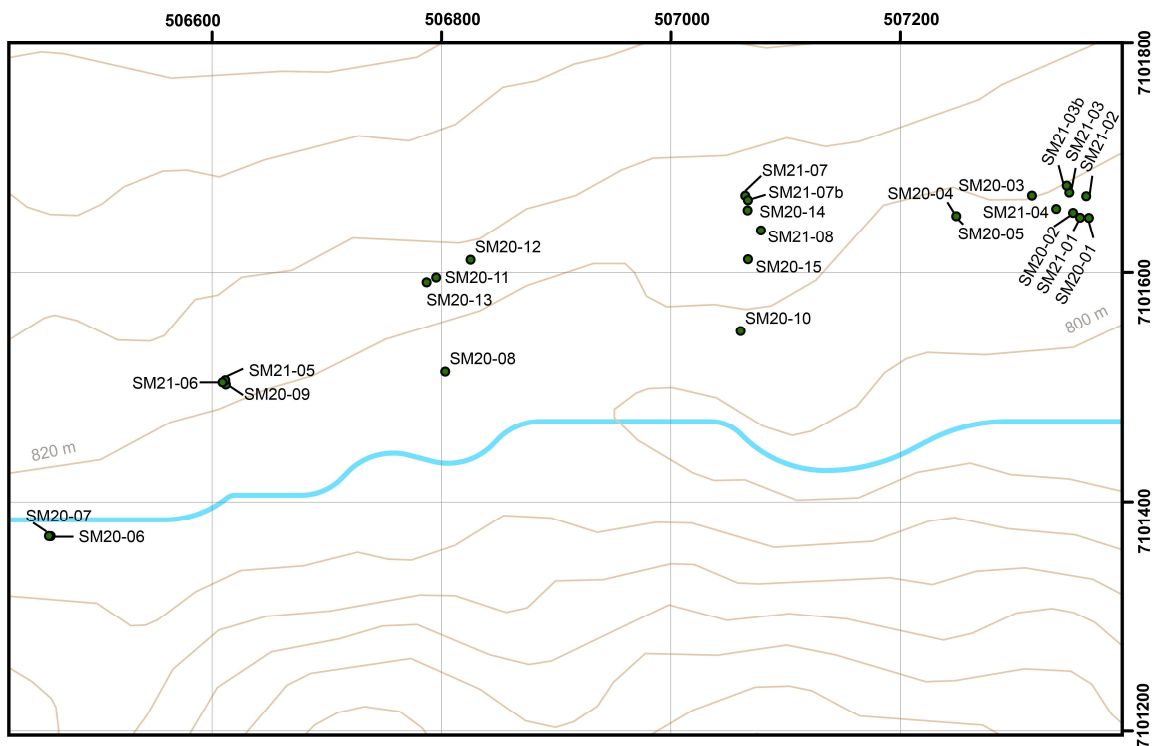

**Figure S7.** Drillhole location map F. Refer to Supplementary Figure S1. for this map's location within the Sixtymile District.

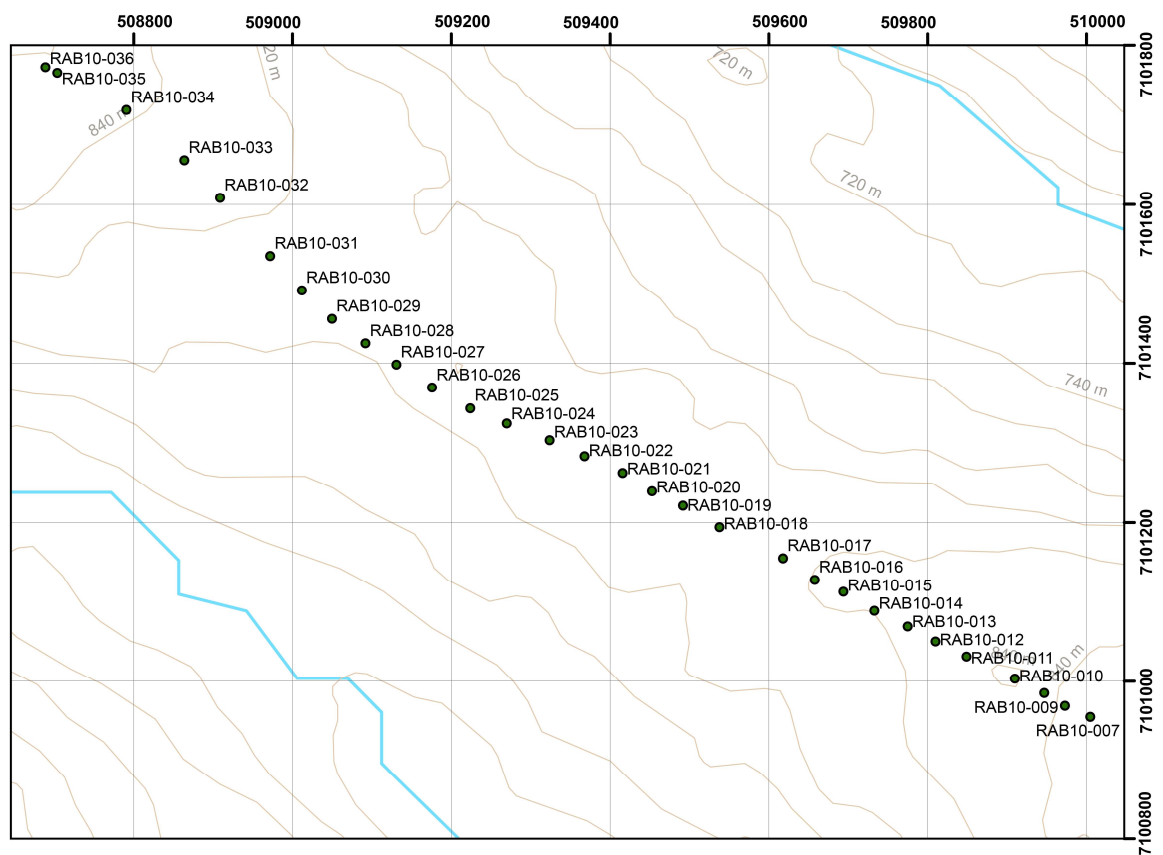

**Figure S8.** Drillhole location map G. Refer to Supplementary Figure S1. for this map's location within the Sixtymile District.

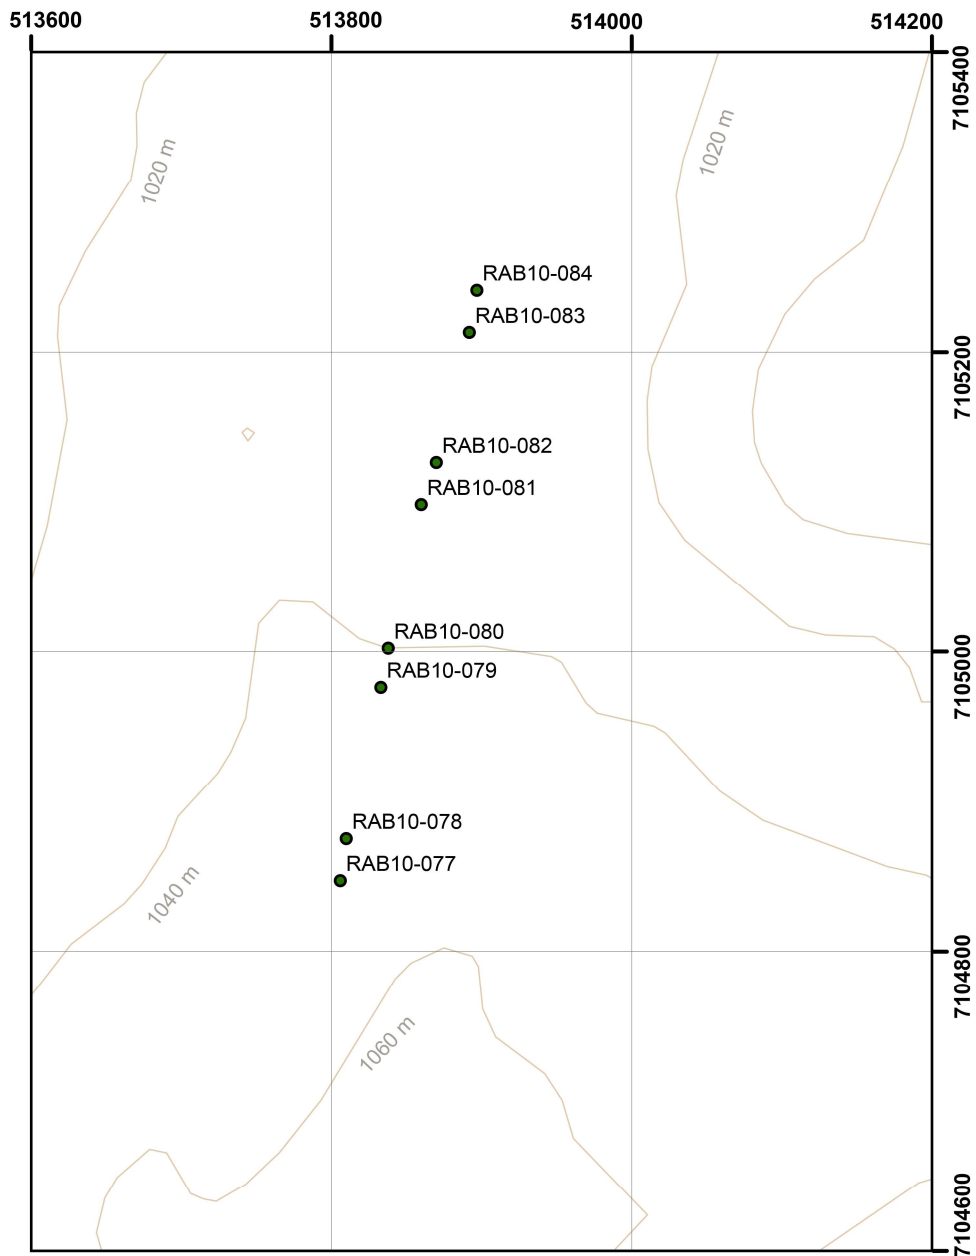

**Figure S9.** Drillhole location map H. Refer to Supplementary Figure S1. for this map's location within the Sixtymile District.



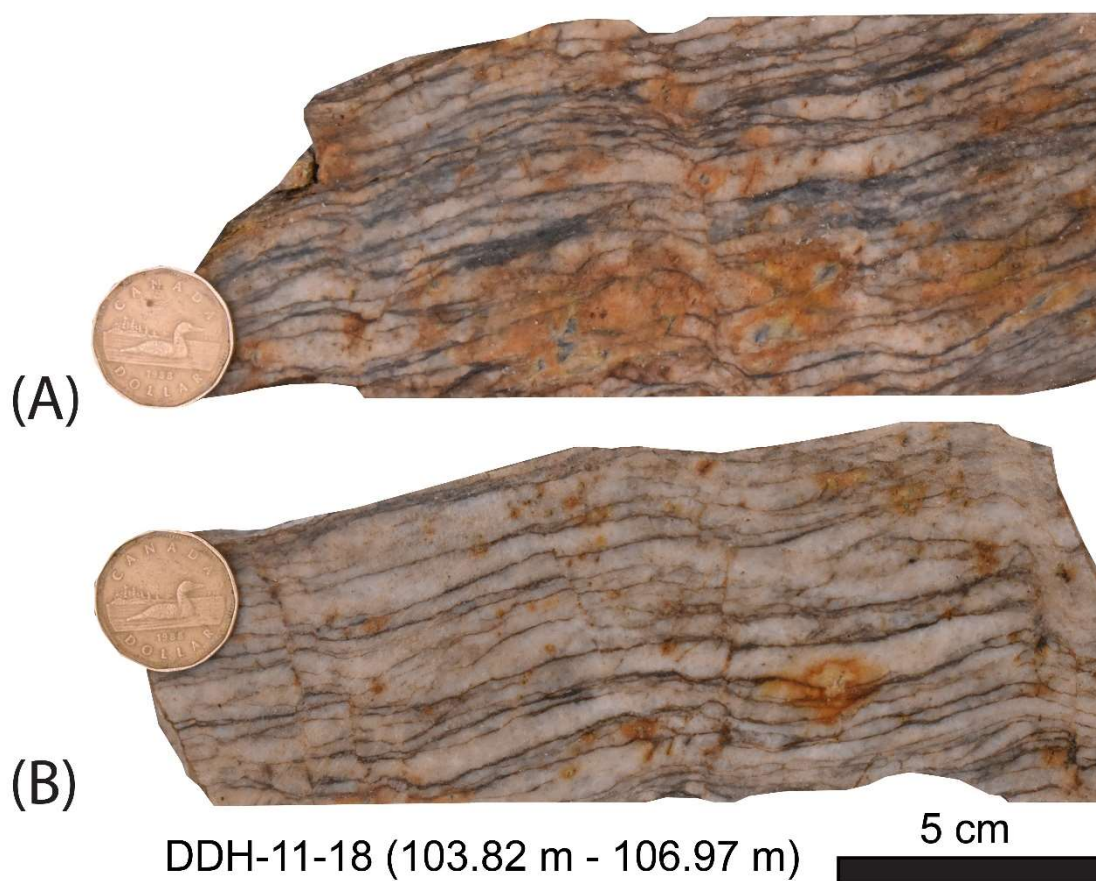

**Figure S10.** DDH-11-18 core samples, identified as medium-grained, quartz-rich quartz muscovite schists, which were measured for magnetic susceptibility.

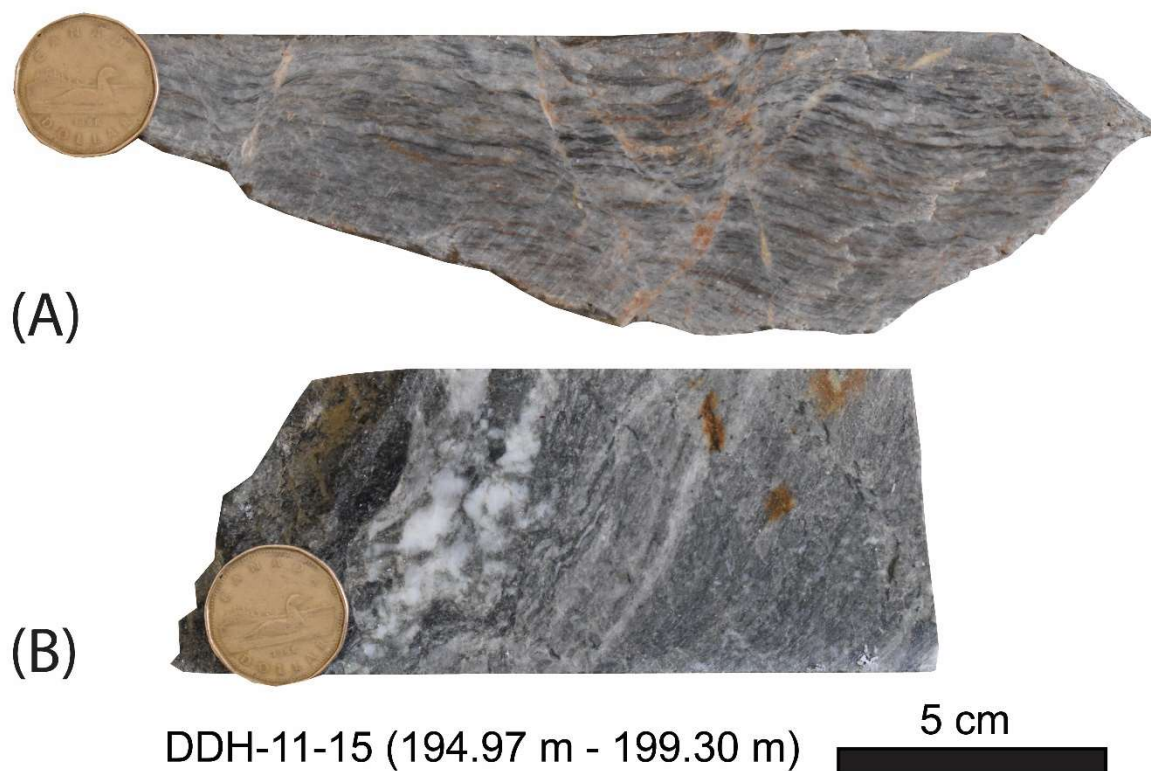

**Figure S11.** DDH-11-15 core samples, identified as strongly foliated, fine- to coarse-grained muscovite quartz schists, measured for magnetic susceptibility.

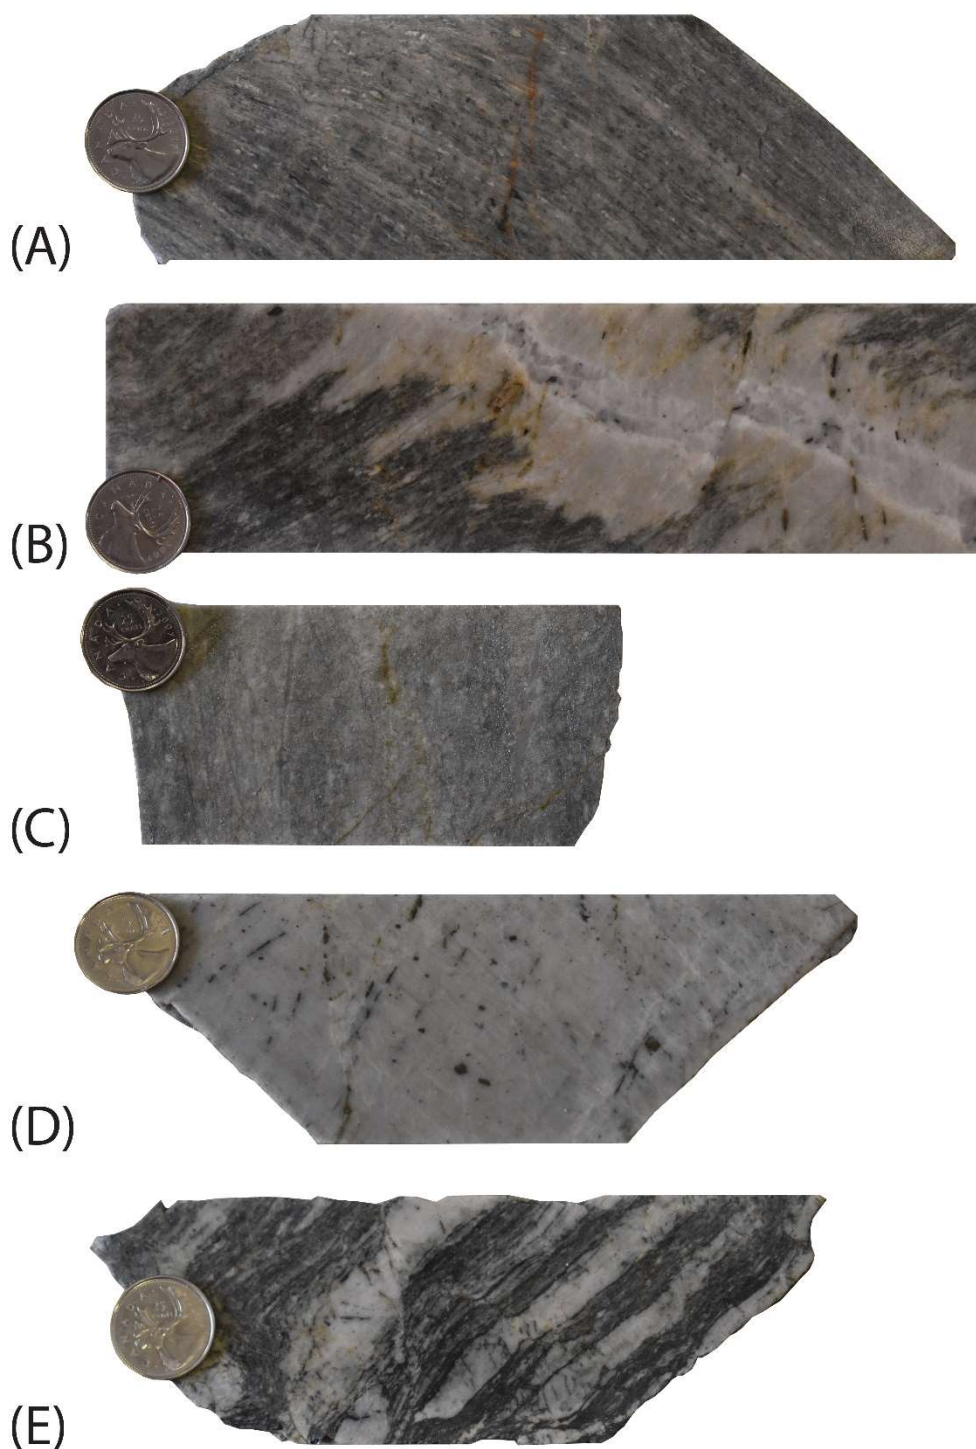

DDH-11-15 (224.90 m - 233.33 m) 5 cm

**Figure S12.**

DDH-11-15 core samples, identified as strongly foliated, fine- to coarse-grained muscovite quartz schists, measured for magnetic susceptibility.



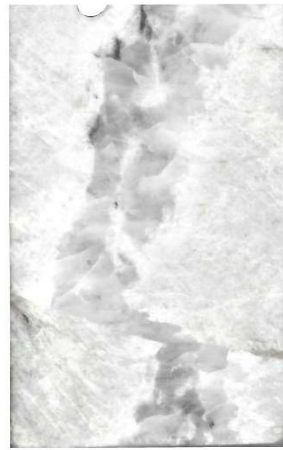

**A** 1 cm

DDH-11-15-1

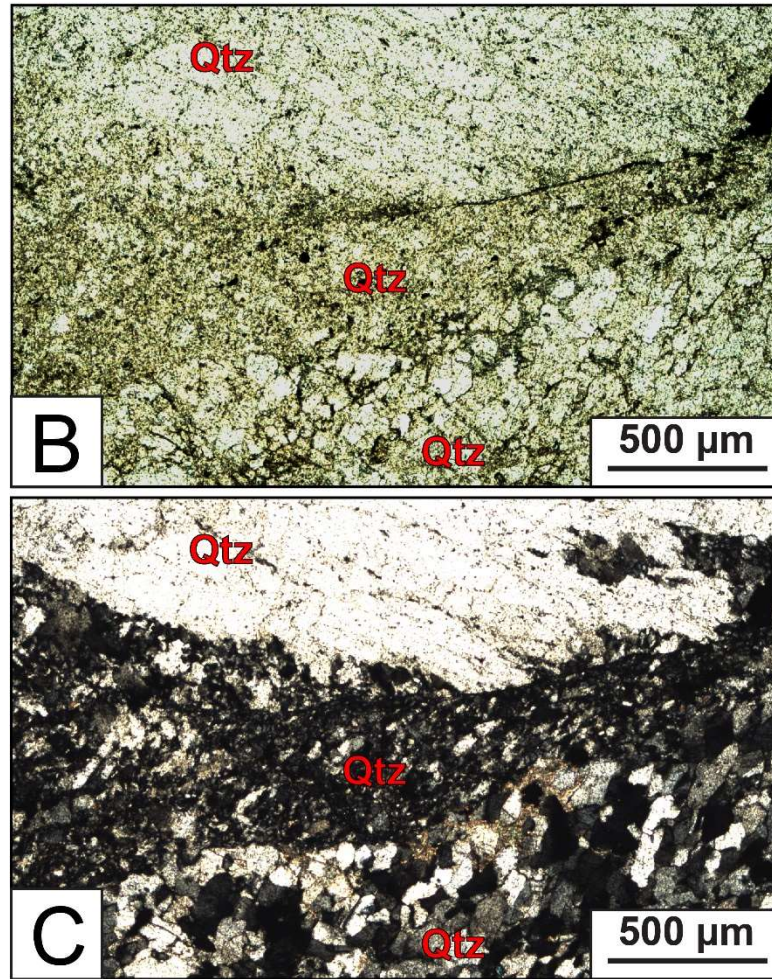

**Figure S13.** Thin section view of DDH-11-15-1, a strongly foliated, fine- to coarse-grained muscovite quartz schist taken from sample shown in Figure 19B. This sample shows offset of two generations of quartz veins. A) Hand sample from which thin section was prepared. B) Plane polarized light view. C) Cross polarized light view. 3 regions of quartz with different textures can be observed from top to bottom on the thin section views in Figure 20A&B: 1) > 1-mm-diameter, coarser crystals belonging to the younger, thinner quartz vein; 2) <50- $\mu$ m-diameter, fine quartz fault gouge; 3) ~100- $\mu$ m-diameter crystals belonging to the older quartz vein. Qtz—quartz.

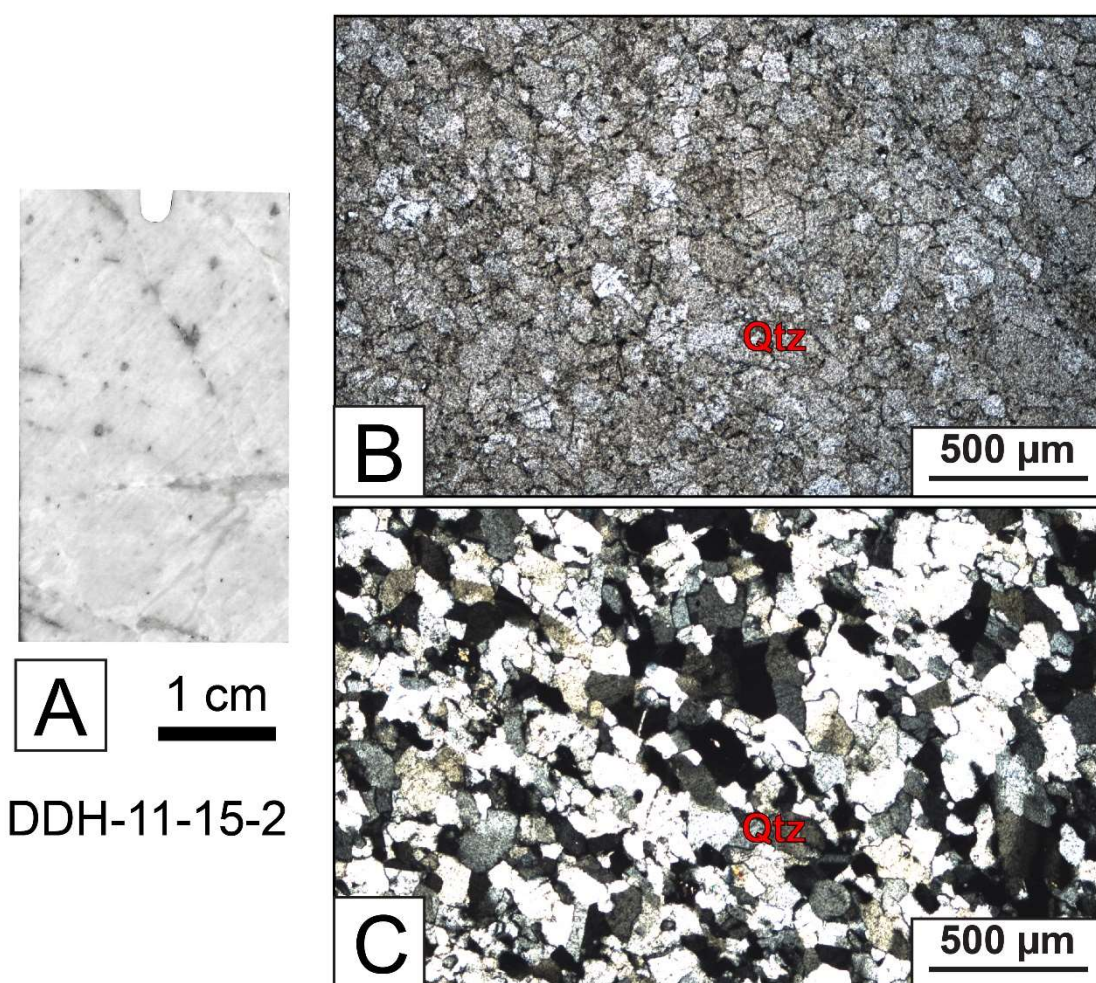

**Figure S14.** Thin section view of DDH-11-15-2, a strongly foliated, fine- to coarse-grained muscovite quartz schist taken from sample shown in Figure 19D. Quartz appear to have undergone recrystallization as evidenced by grain boundary migration. A) Hand sample from which thin section was prepared. B) Plane polarized light view. C) Cross polarized light view. D) Transmitted light view. Qtz—quartz



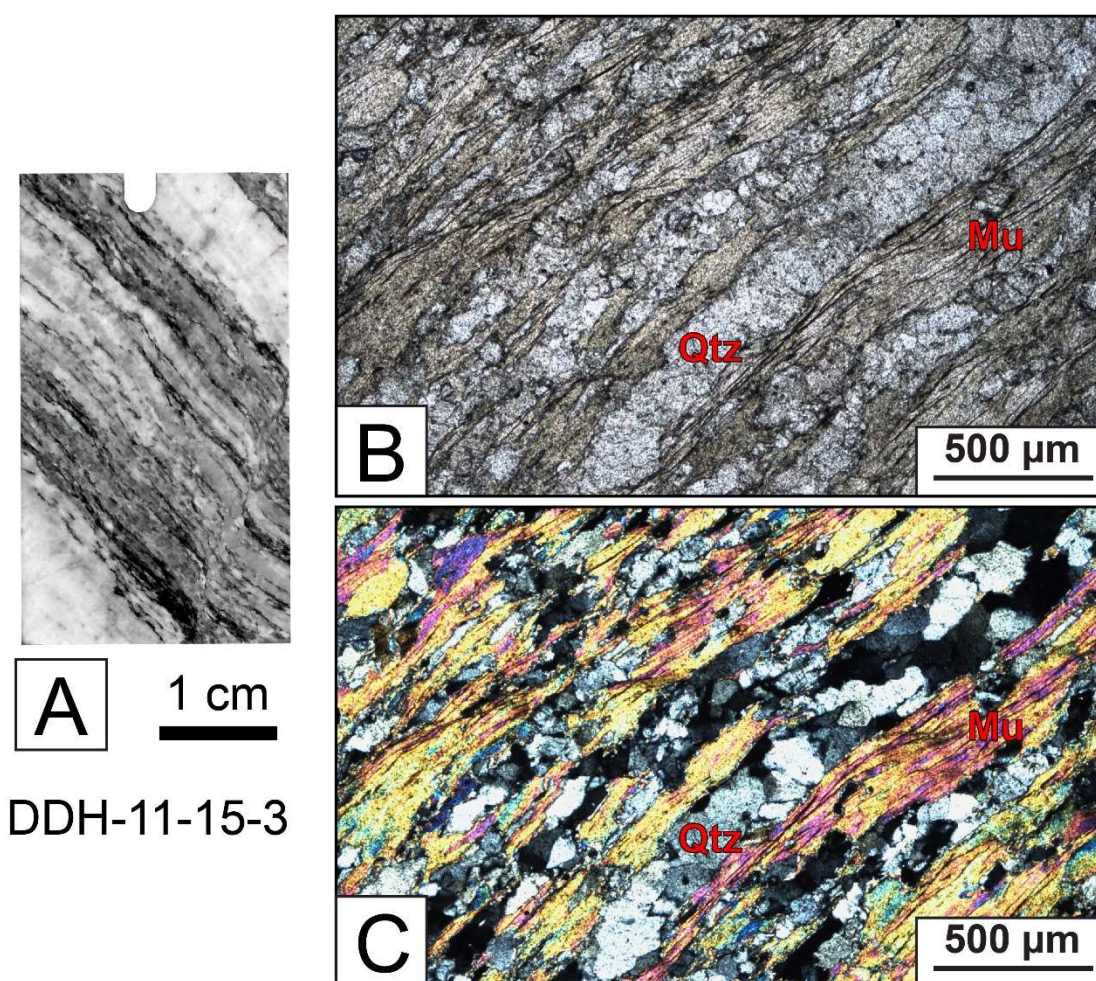

**Figure S15.** Thin section view of DDH-11-15-3, a strongly foliated, fine- to coarse-grained muscovite quartz schist taken from sample shown in Figure 19E. Alternating layers of mica and quartz crystals with an evident preferred orientation can be observed. A) Hand sample from which thin section was prepared. B) Plane polarized light view. C) Cross polarized light view. Qtz—quartz, Mu—muscovite.



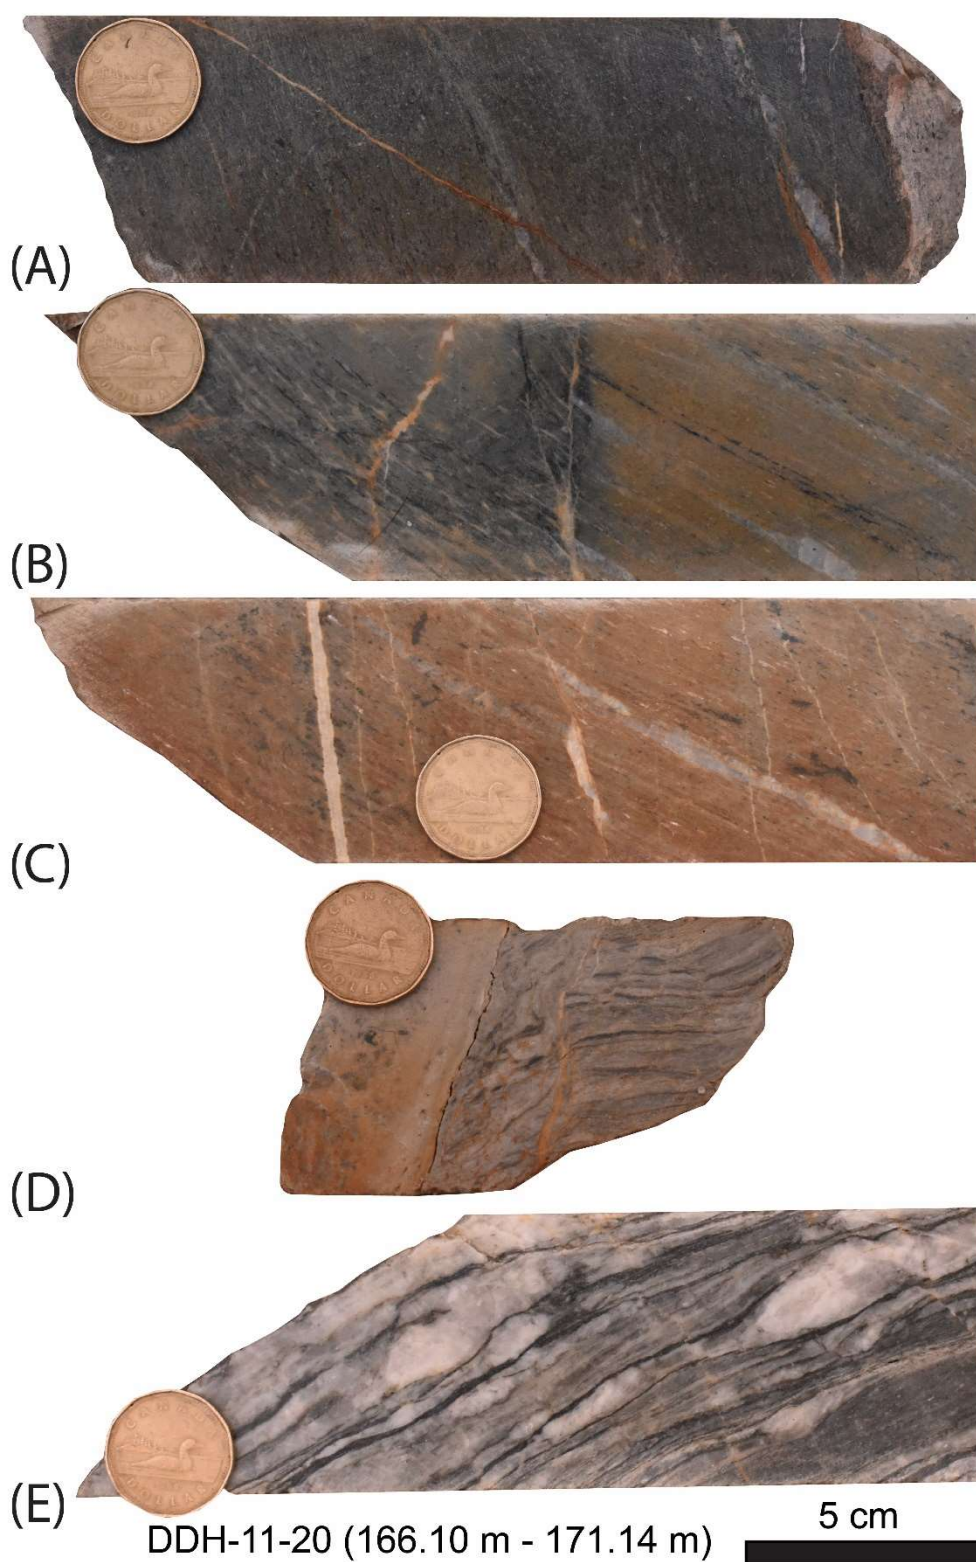

**Figure S16.** DDH-11-20 core samples, strongly foliated, fine- to coarse-grained muscovite quartz schists, measured for magnetic susceptibility.

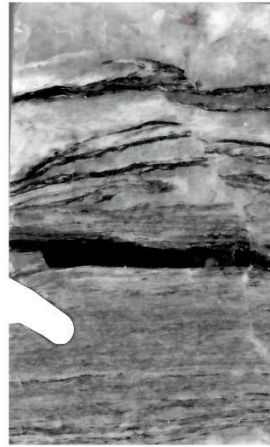

**A** 1 cm

DDH-11-20-1

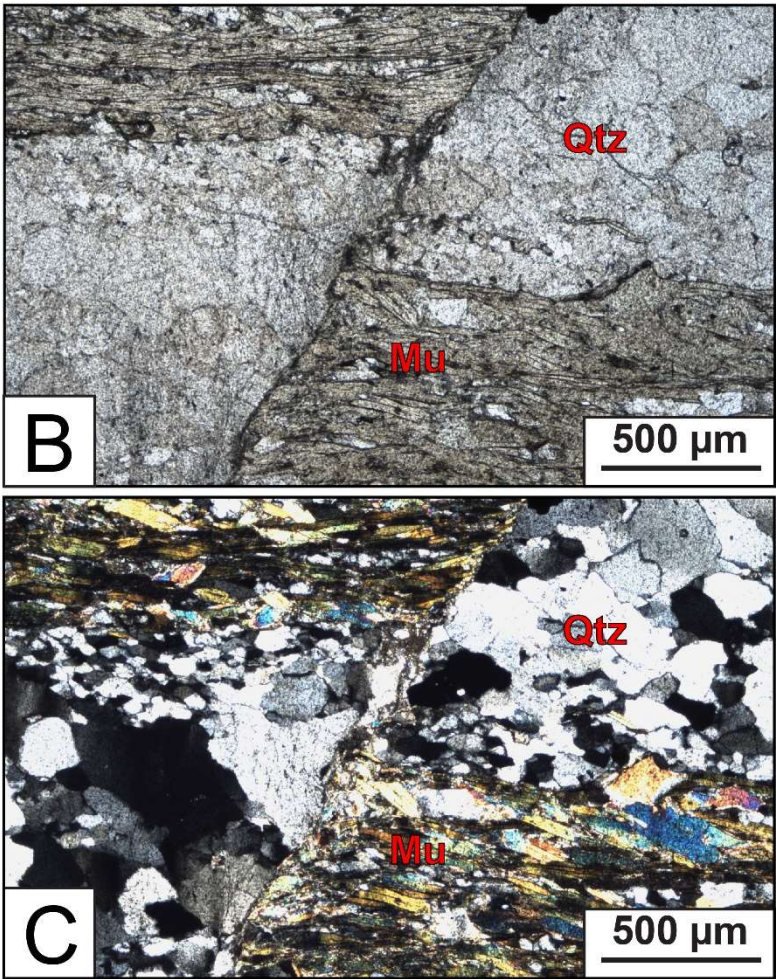

**Figure S17.** Thin section view of DDH-11-20-1, a strongly foliated, fine- to coarse-grained muscovite quartz schist. This samples exhibits faulted alternating layers of mica and quartz crystals. A) Hand sample from which thin section was prepared. B) Plane polarized light view. C) Cross polarized light view. Qtz—quartz, Mu—muscovite.



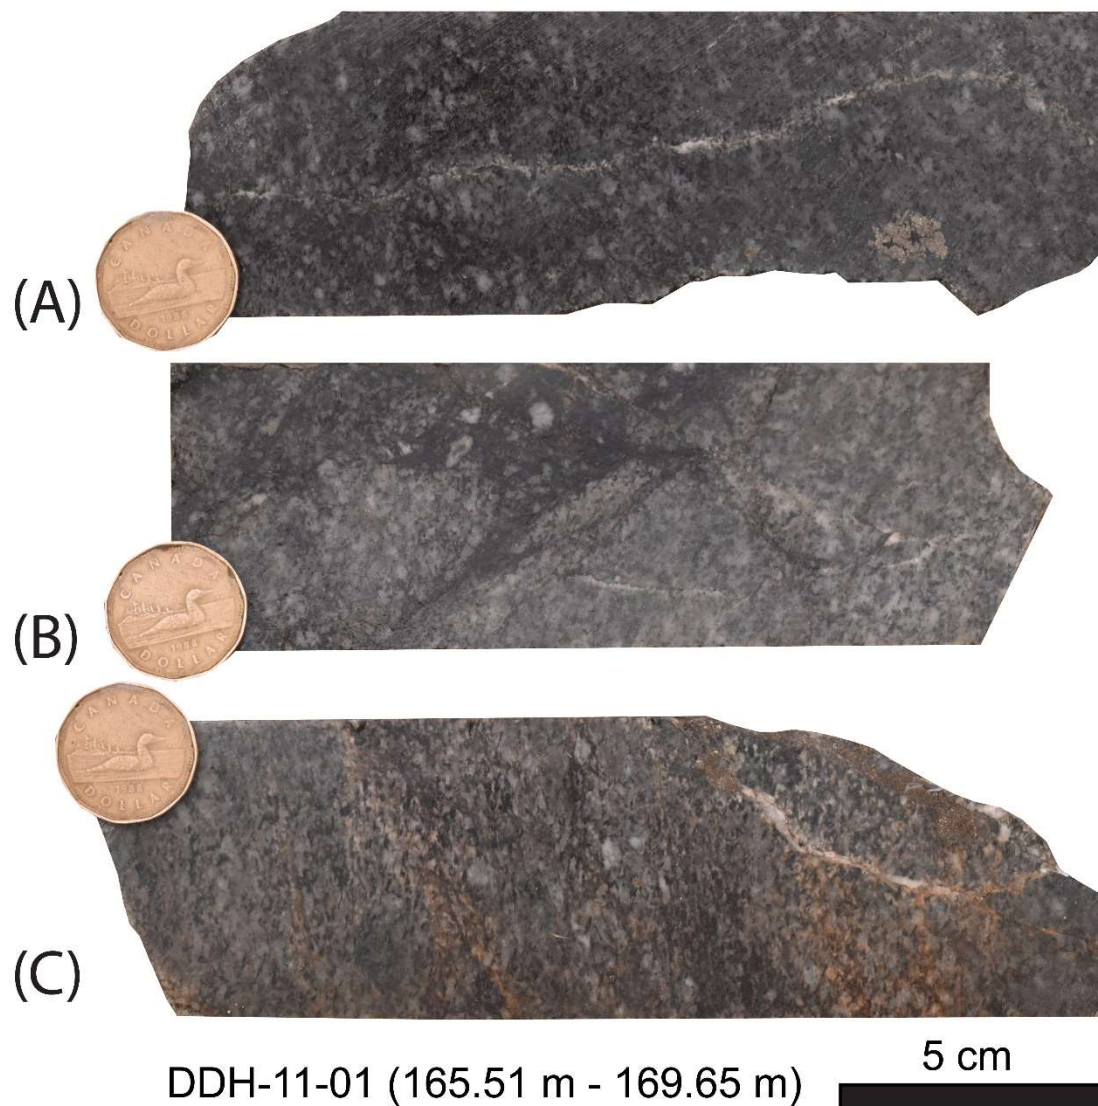

**Figure S18.** DDH-11-01 core samples, identified as generally medium-grained schists (with variety of compositions), measured for magnetic susceptibility.

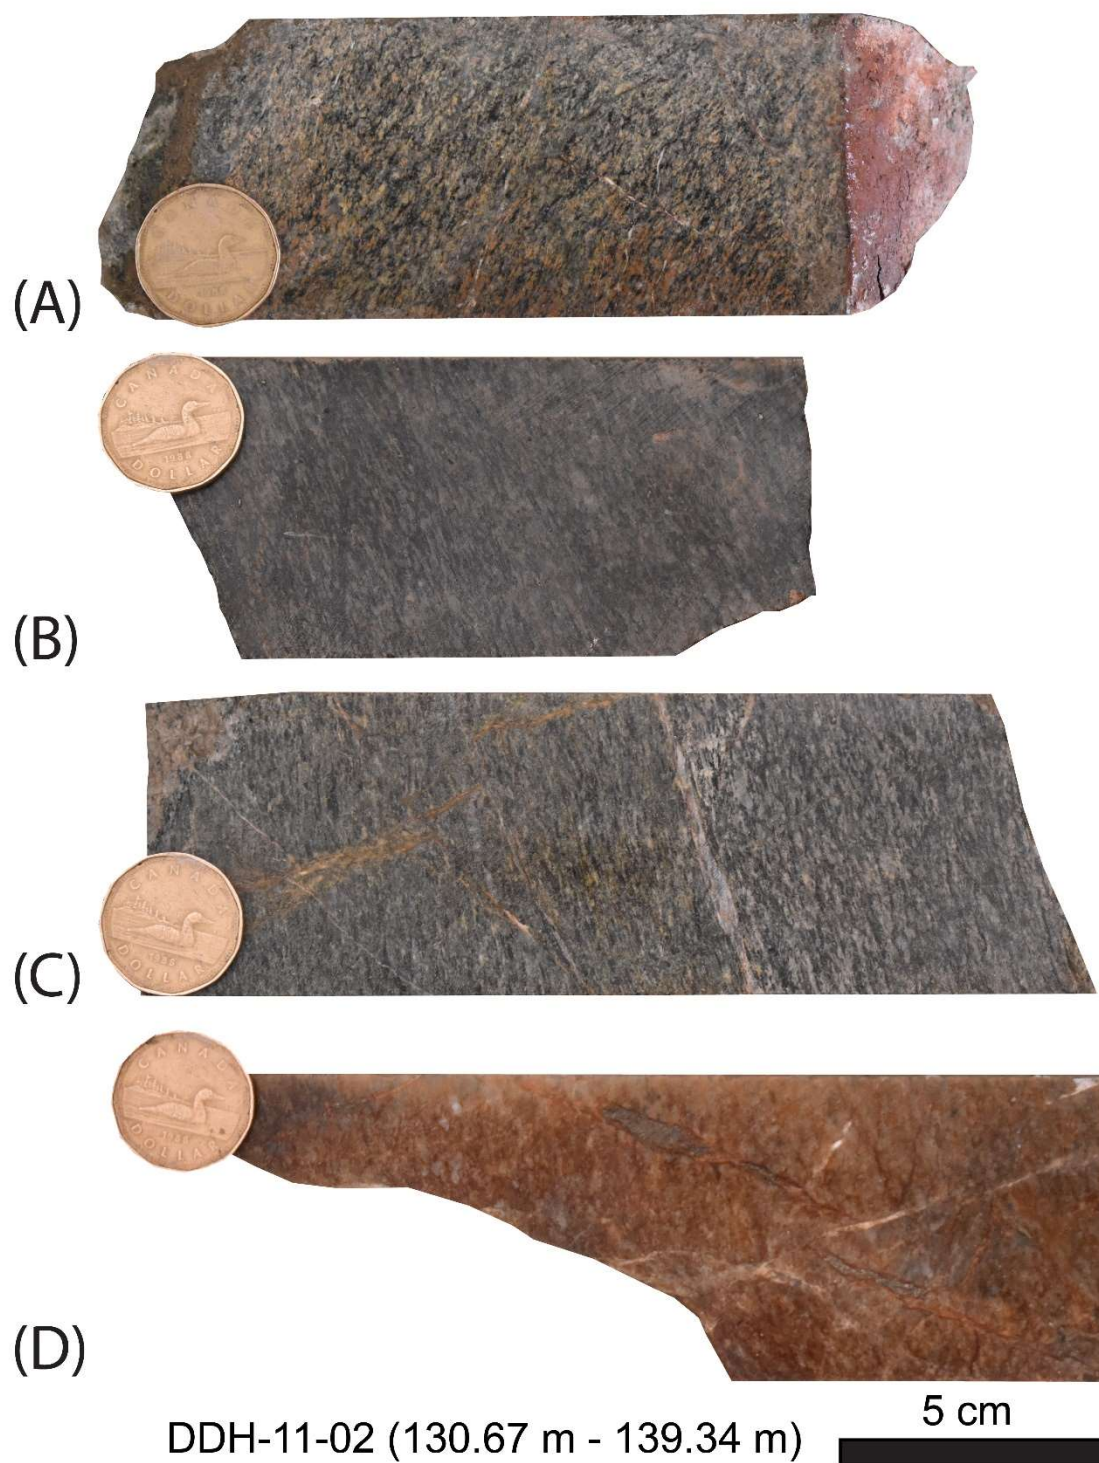

**Figure S19.** DDH-11-02 core samples, identified as chlorite-mica schists, measured for magnetic



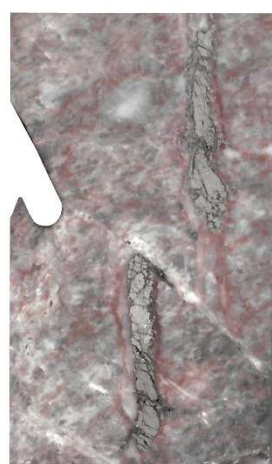

**A** 1 cm

DDH-11-02-1

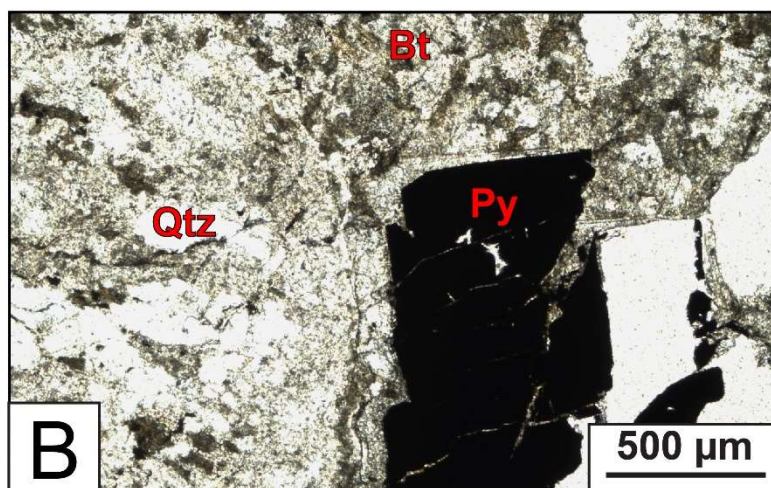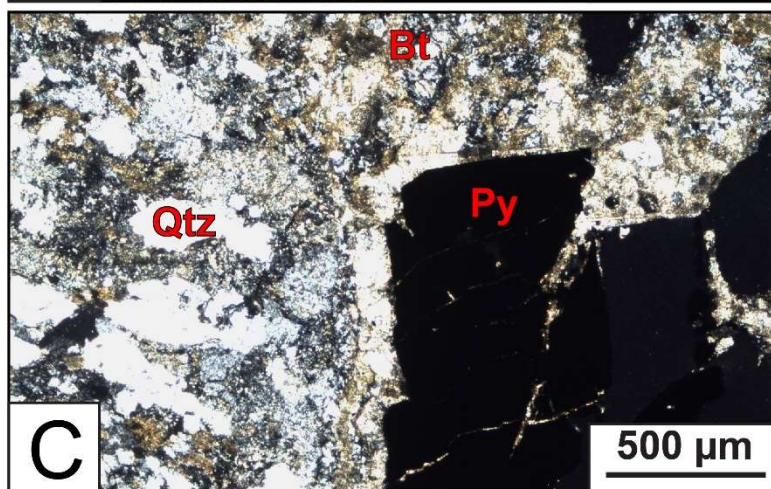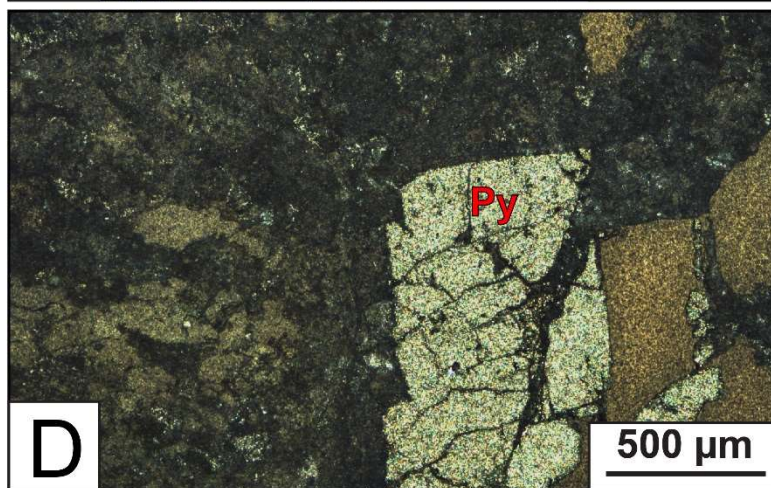

susceptibility.

**Figure S20.** Thin section view of DDH-11-02-1, a highly-altered chlorite-mica schist with stinger-related sulfide mineralization (e.g., pyrite). A) Hand sample from which thin section was prepared. B) Plane polarized light view. C) Cross polarized light view. D) Transmitted light view. Qtz—quartz, Bt—biotite, Py—pyrite.



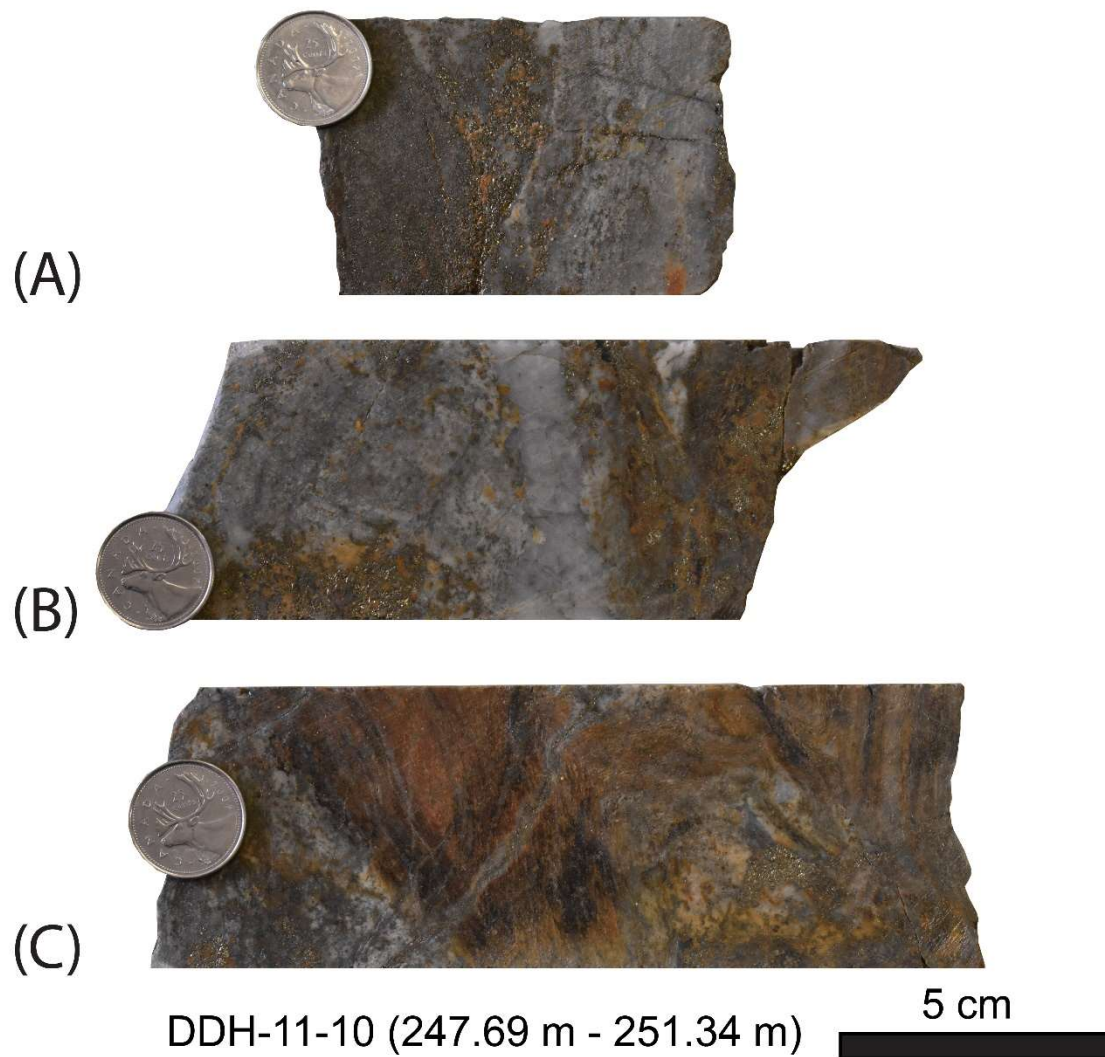

**Figure S21.** DDH-11-10 core samples, identified as quartz-biotite schists, measured for magnetic susceptibility.

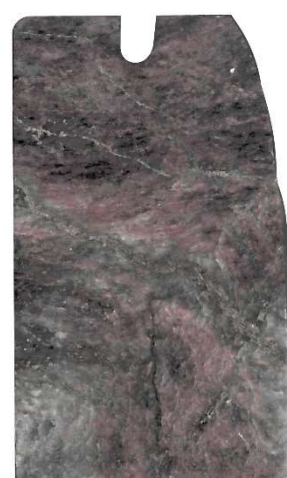

A

1 cm

DDH-11-10-1

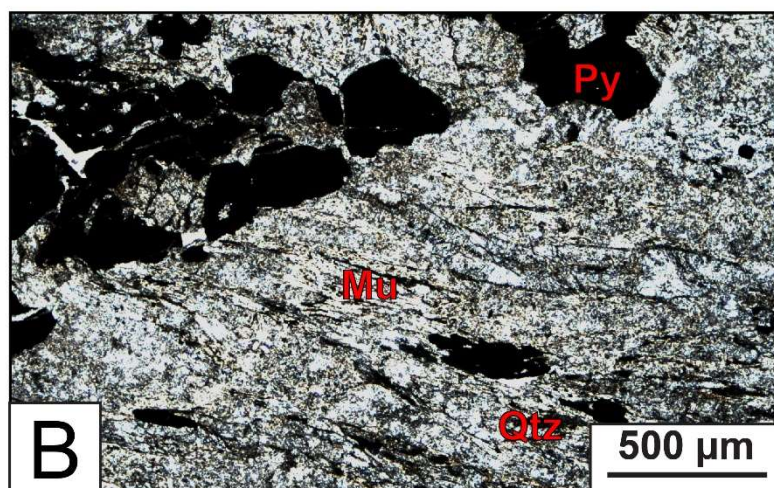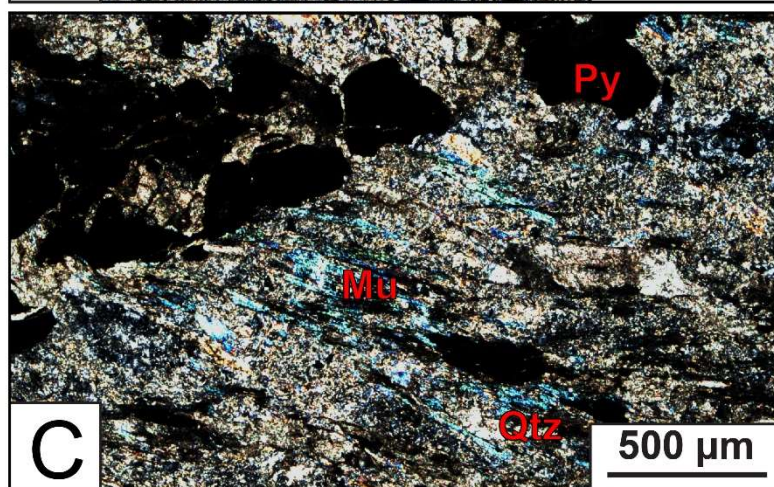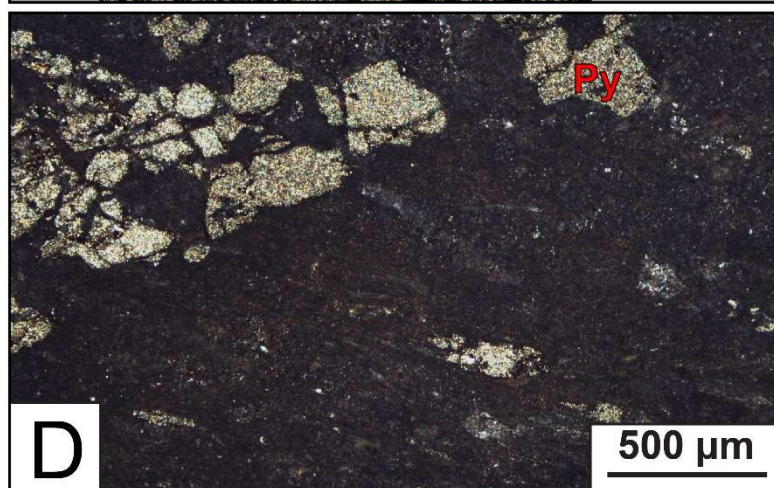

**Figure S22.** Thin section view of DDH-11-10-1, a quartz-mica schist which contains disseminated pyrite. A) Hand sample from which thin section was prepared. B) Plane polarized light view. C) Cross polarized light view. D) Transmitted light view. Qtz—quartz, Mu—muscovite, Py—pyrite.



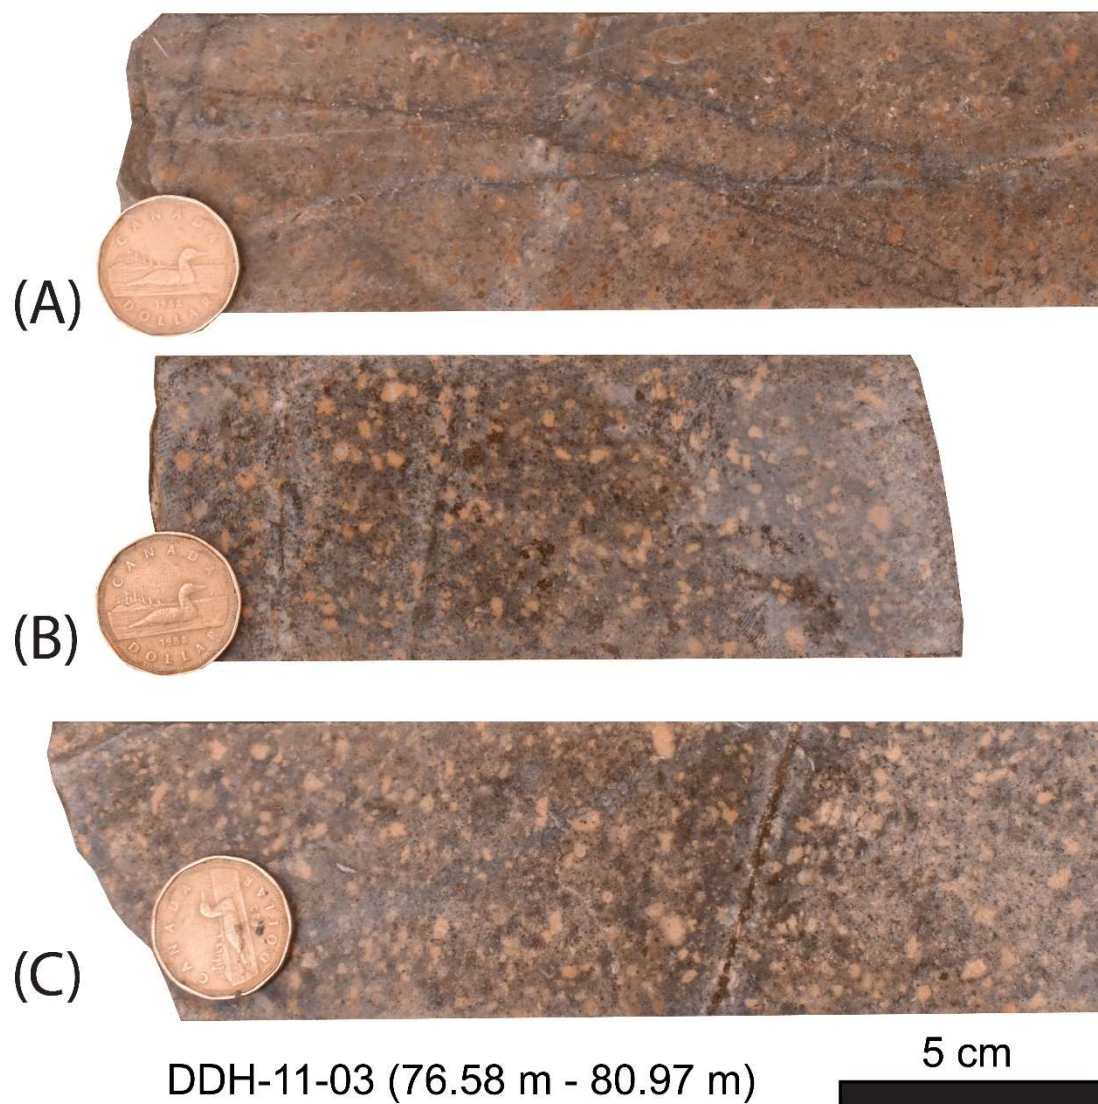

**Figure S23.** DDH-11-03 core samples, identified as fine- to coarse-grained porphyritic andesites, measured for magnetic susceptibility.

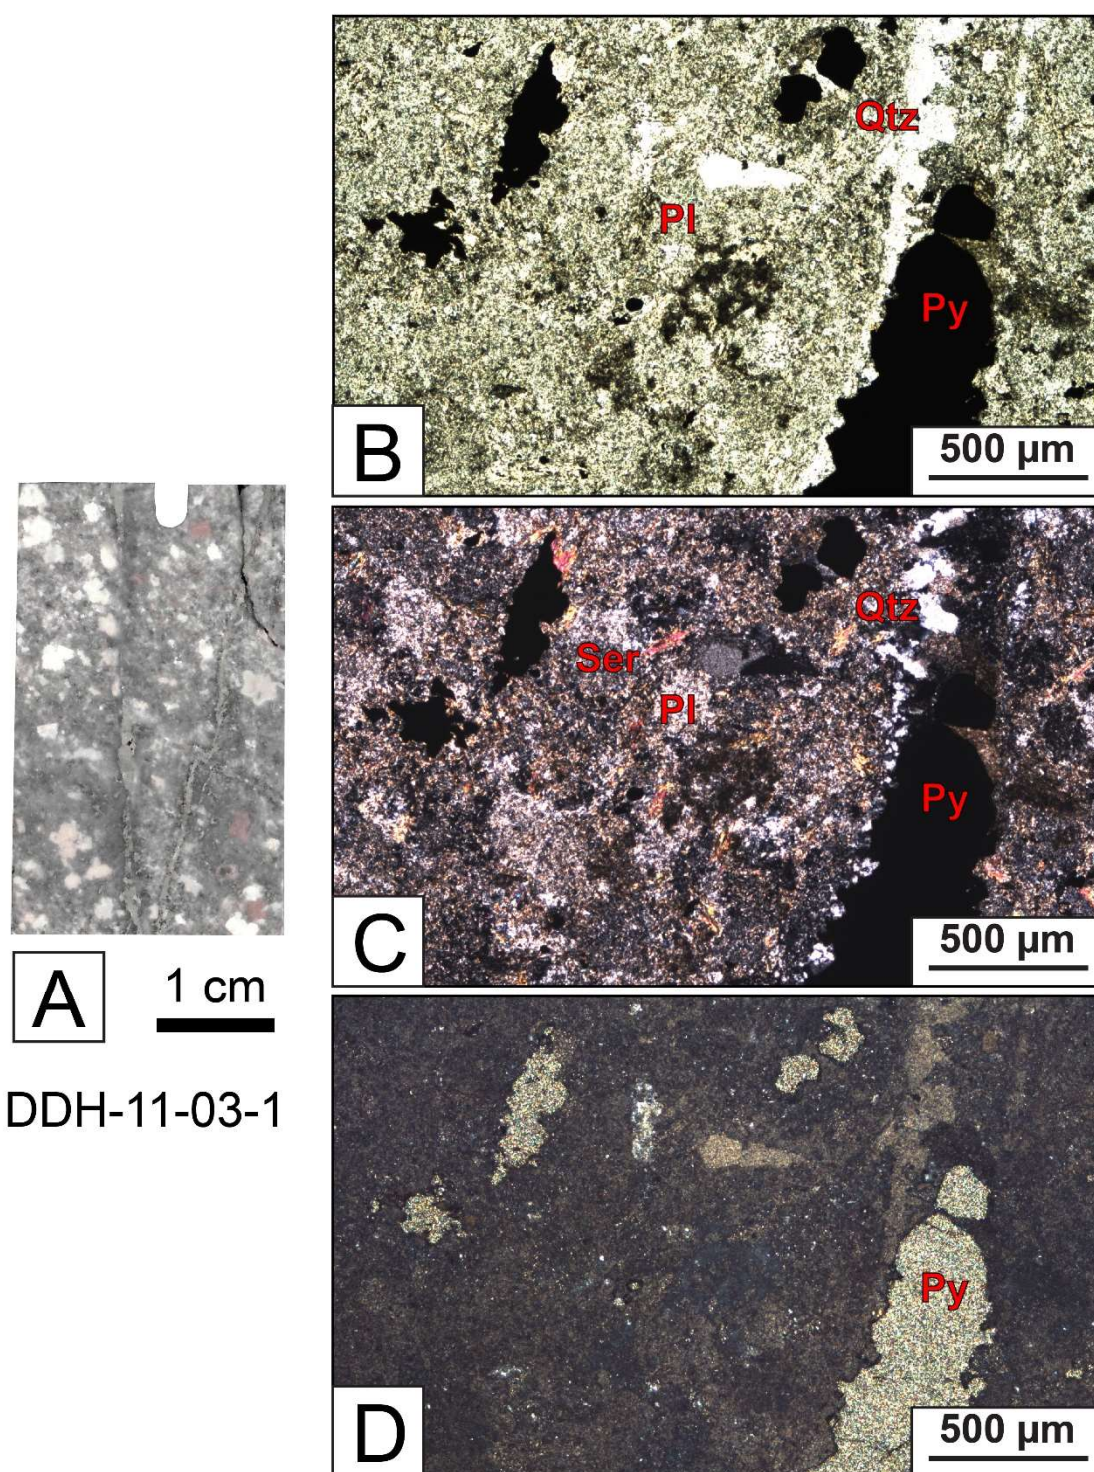

**Figure S24.** Thin section view of DDH-11-03-1, a highly-altered, fine- to coarse-grained porphyritic andesite which contains stringer-related pyrite. A) Hand sample from which thin section was prepared. B) Plane polarized light view. C) Cross polarized light view. D) Transmitted light view. Qtz—quartz, Py—pyrite, Pl—plagioclase, Ser—sericitization.



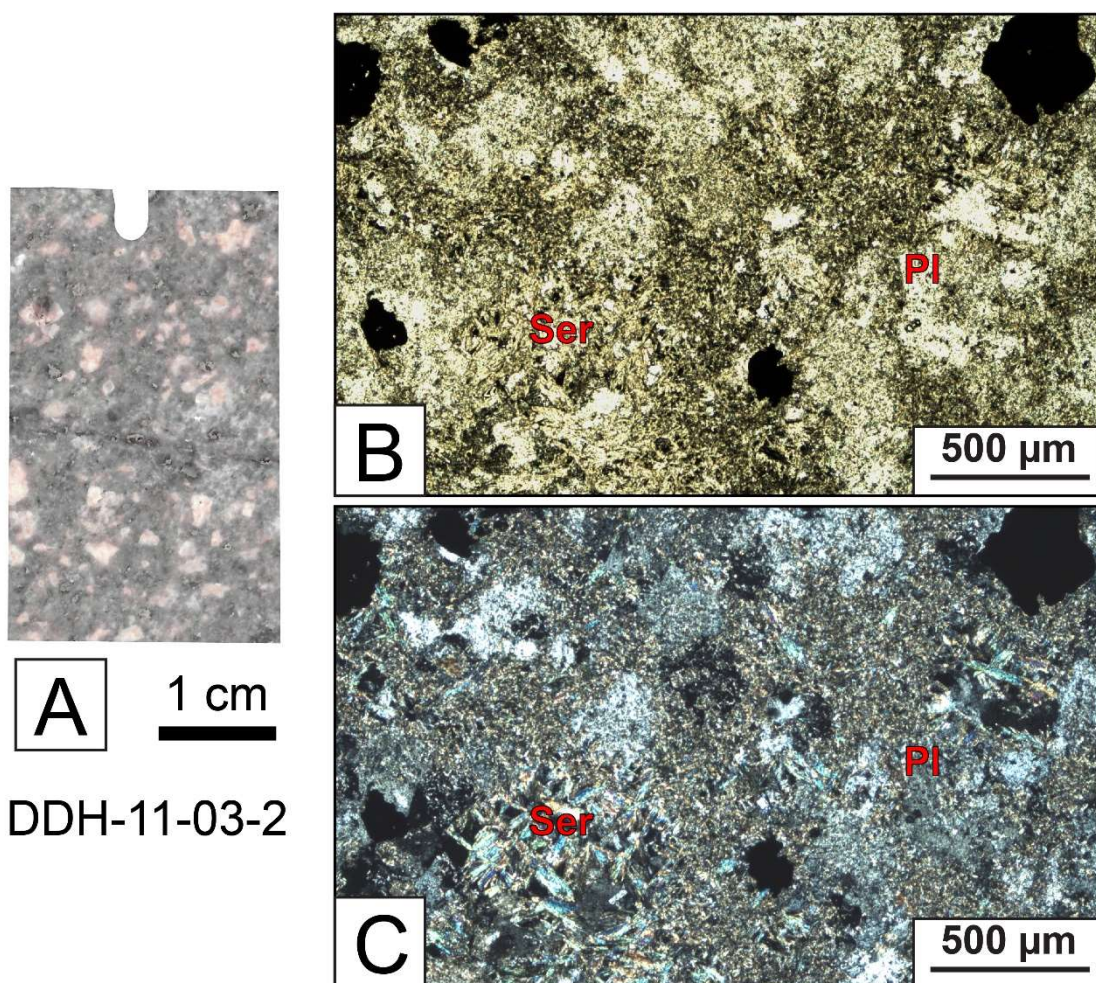

**Figure S25.** Thin section view of DDH-11-03-2, a highly-altered, fine- to coarse-grained porphyritic andesite. A) Hand sample from which thin section was prepared. B) Plane polarized light view. C) Cross polarized light view. Pl—plagioclase, Ser—sericitization.



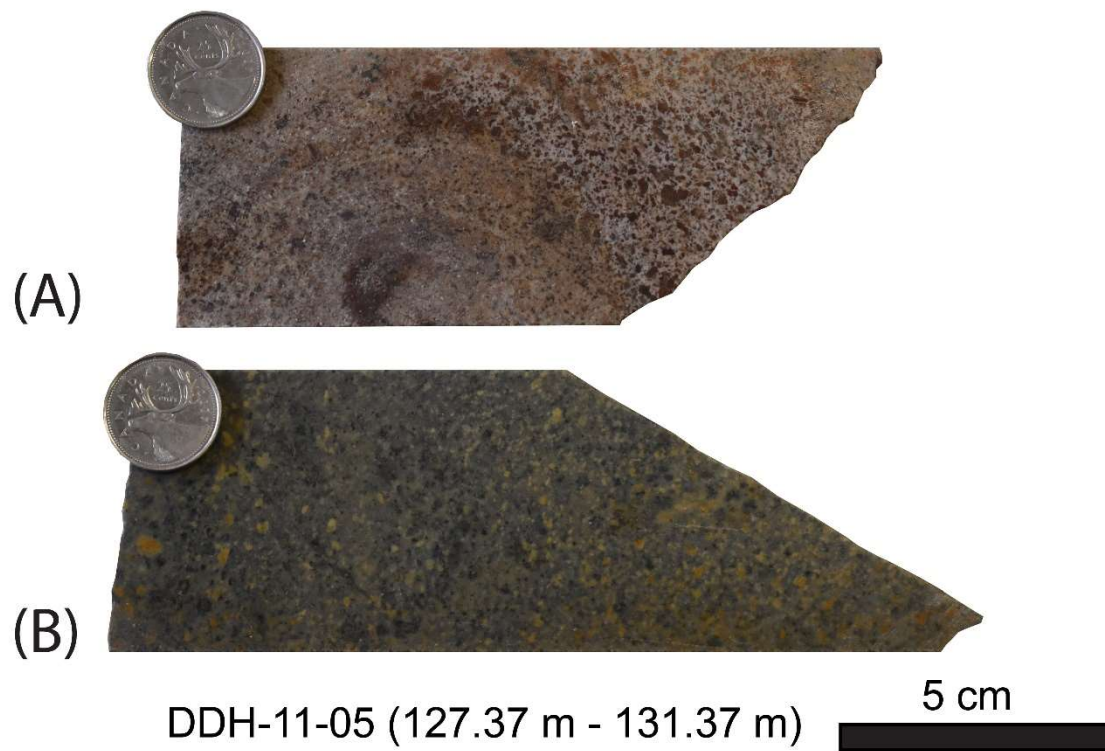

**Figure S26.** DDH-11-05 core samples, identified as fine- to coarse-grained porphyritic andesites, measured for magnetic susceptibility.

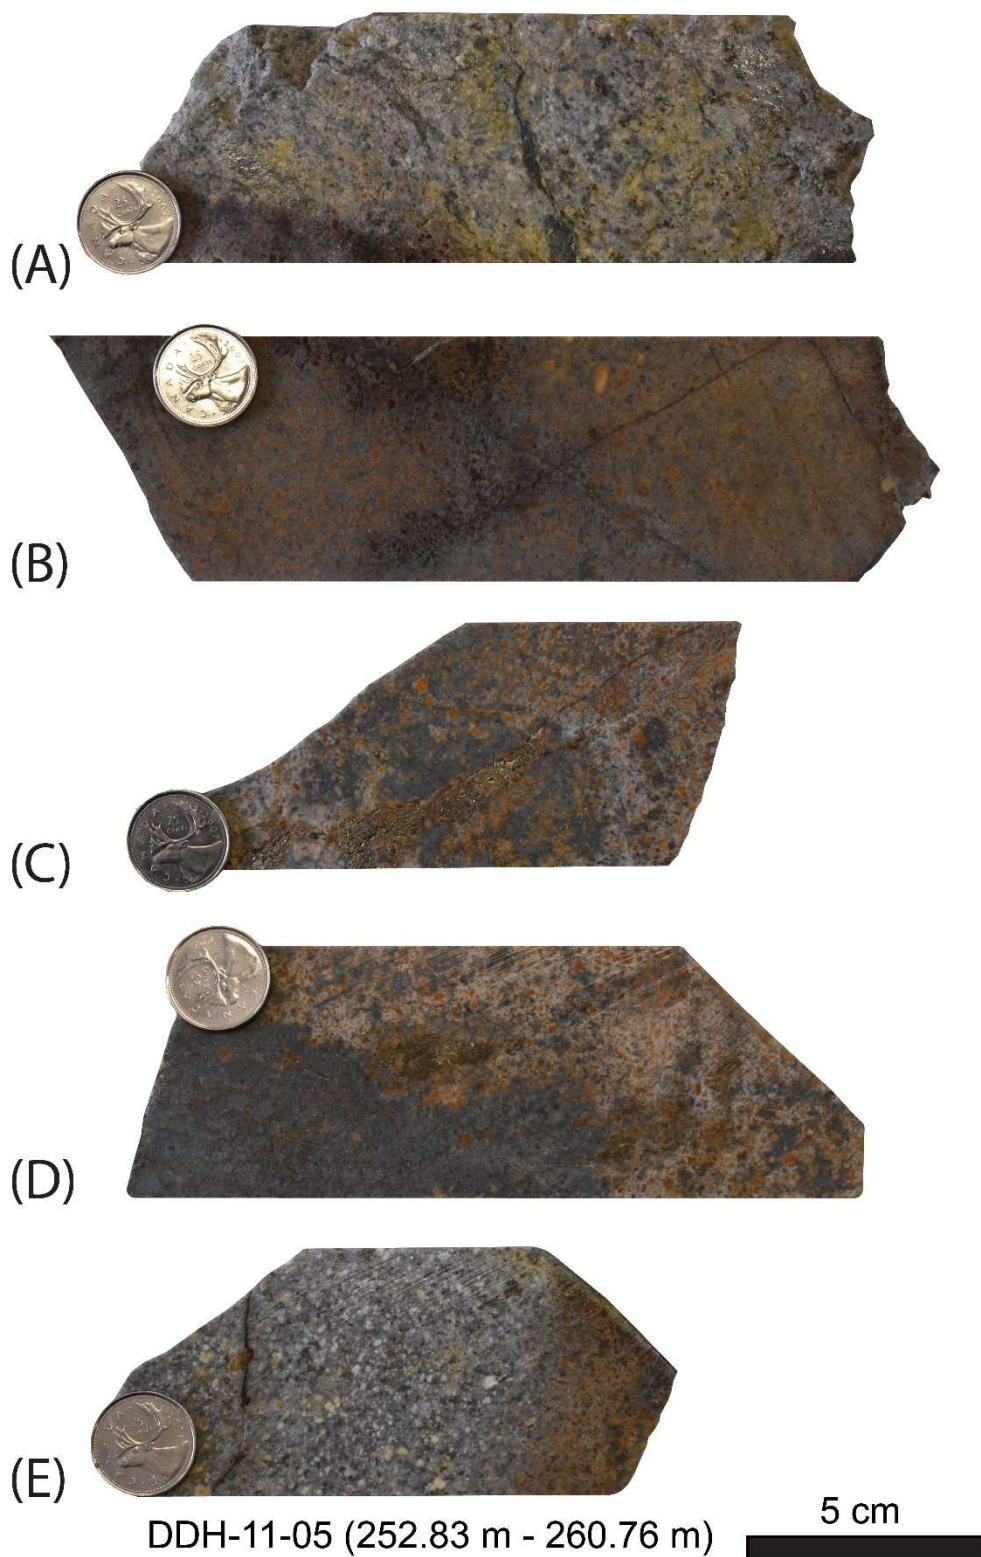

**Figure S27.** DDH-11-05 core samples, identified as fine- to coarse-grained porphyritic andesites, measured for magnetic susceptibility.



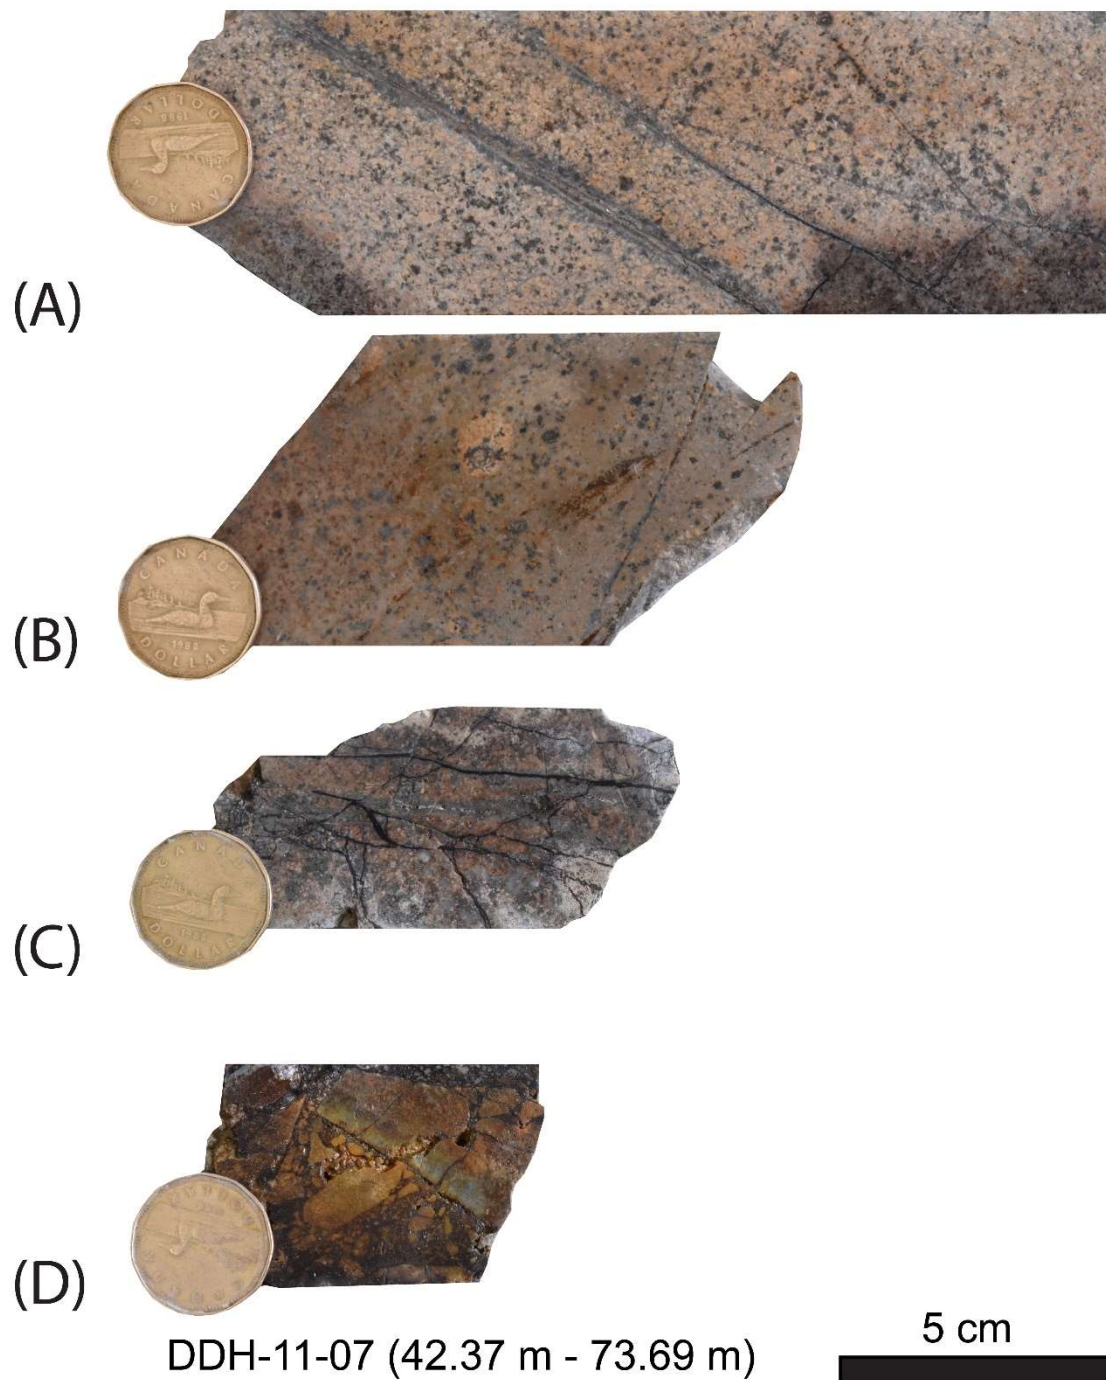

**Figure S28.** DDH-11-07 core samples, identified as fine- to coarse-grained porphyritic andesites, measured for magnetic susceptibility.

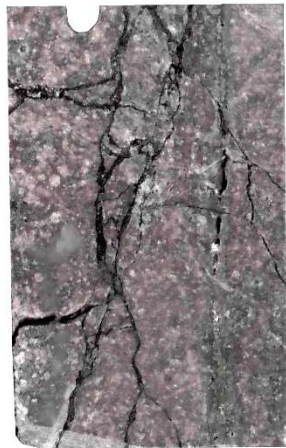

**A** 1 cm

DDH-11-07-1

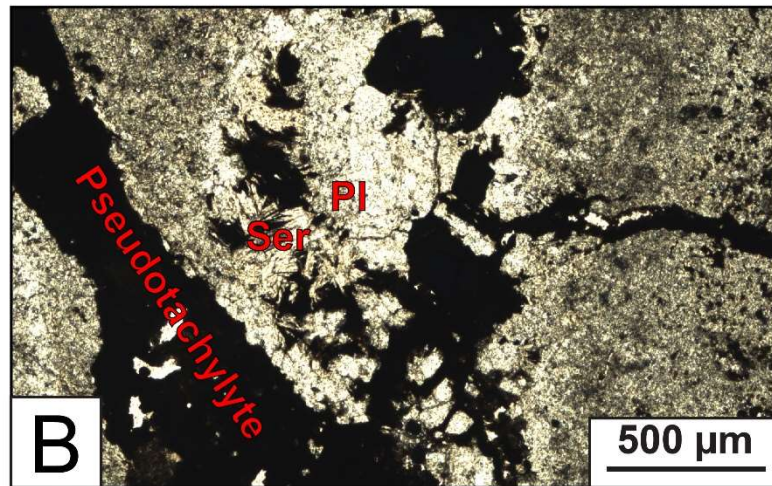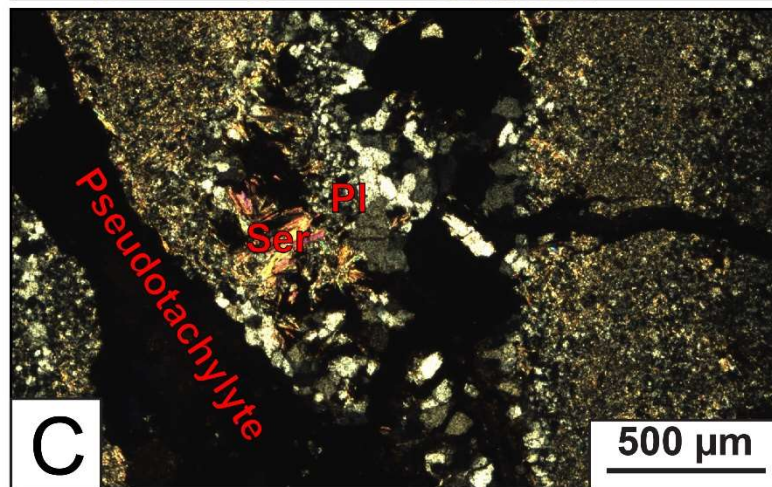

**Figure S29.** Thin section view of DDH-11-07-1, a fine- to coarse-grained porphyritic andesite exhibiting fault-generated pseudotachylyte. A) Hand sample from which thin section was prepared. B) Plane polarized light view. C) Cross polarized light view. Pl—plagioclase, Ser—sericitization.



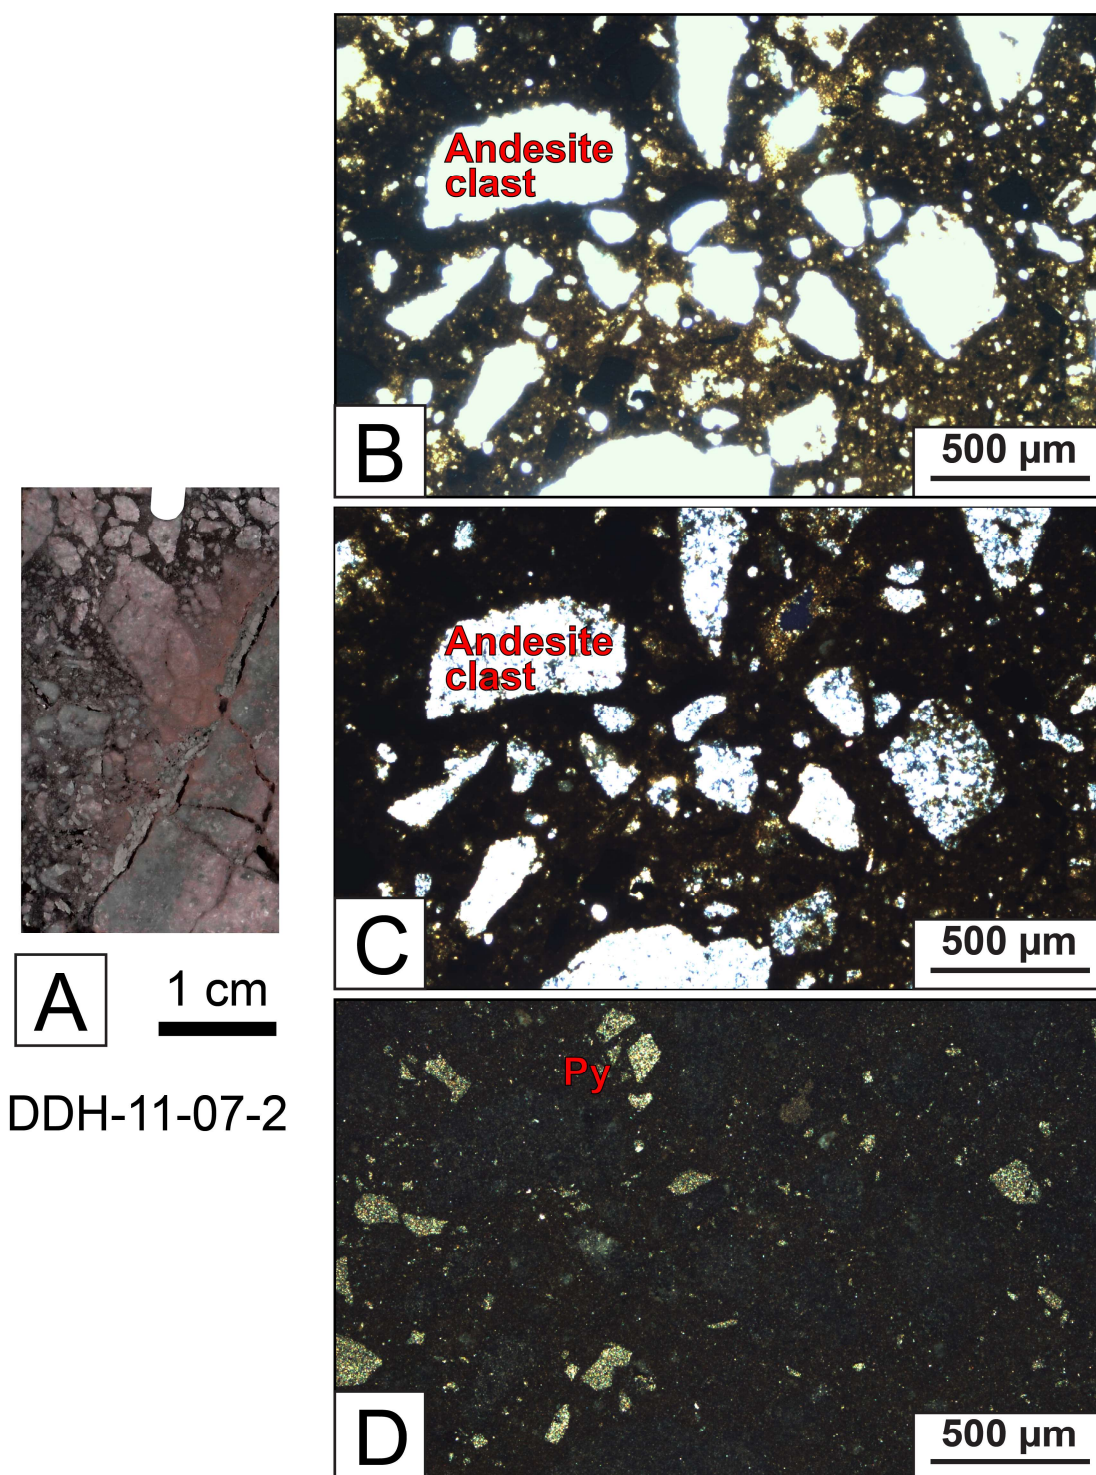

**Figure S30.** Thin section view of DDH-11-07-2, a brecciated fine- to coarse-grained porphyritic andesite. A) Hand sample from which thin section was prepared. B) Plane polarized light view. C) Cross polarized light view. D) Transmitted light view.

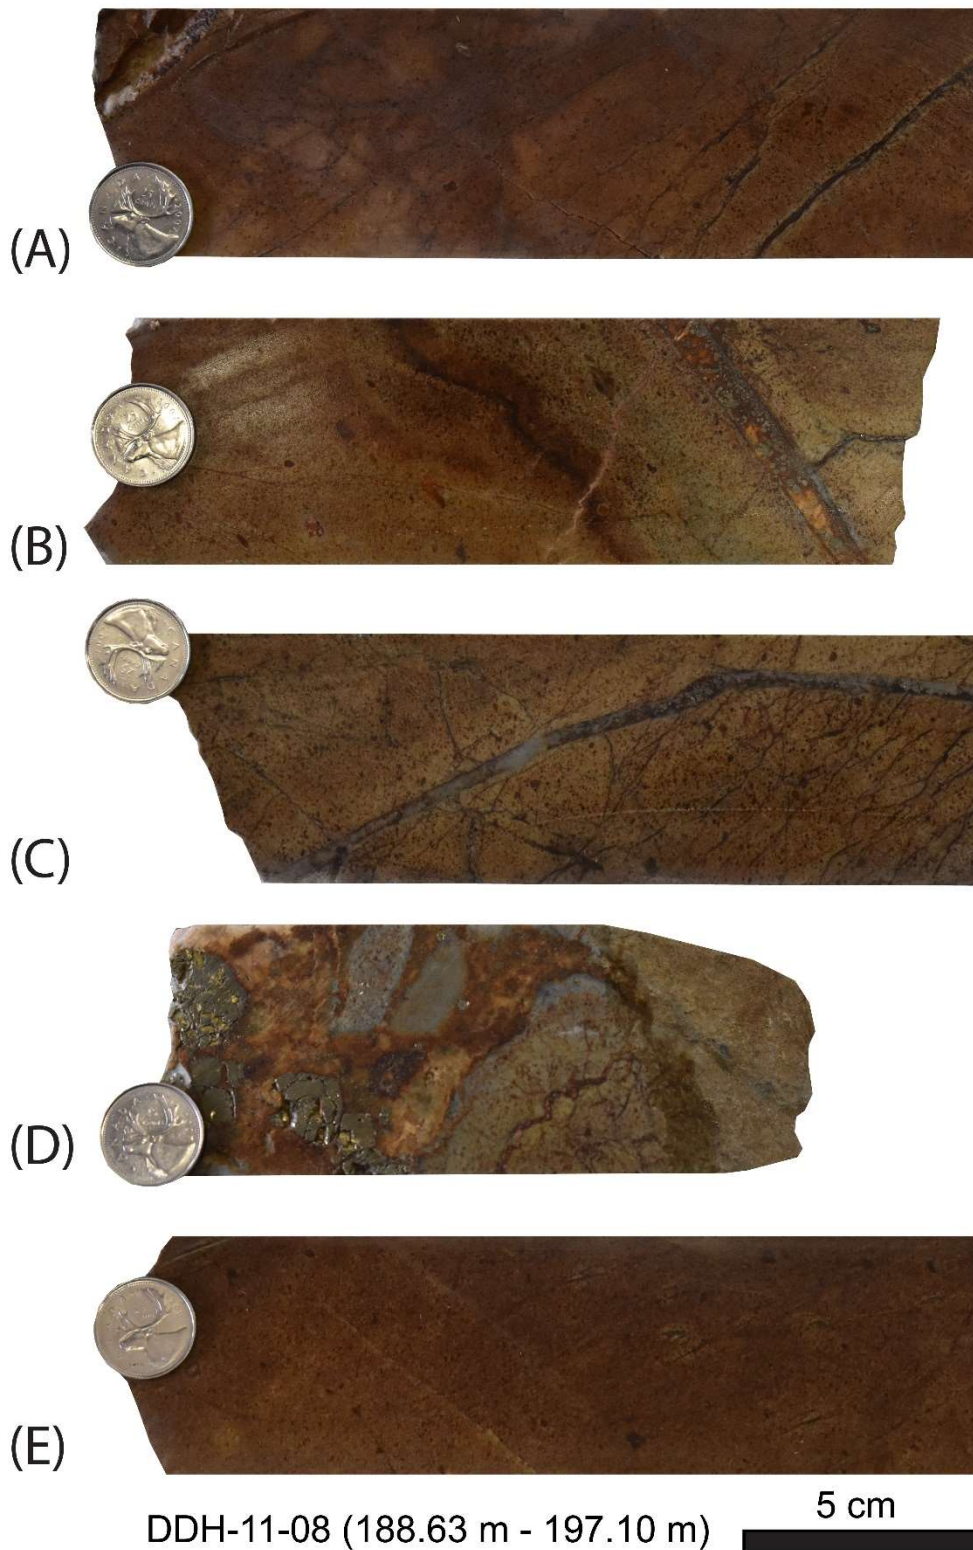

**Figure S31.** DDH-11-08 core samples, identified as fine- to coarse-grained porphyritic andesites, measured for magnetic susceptibility.



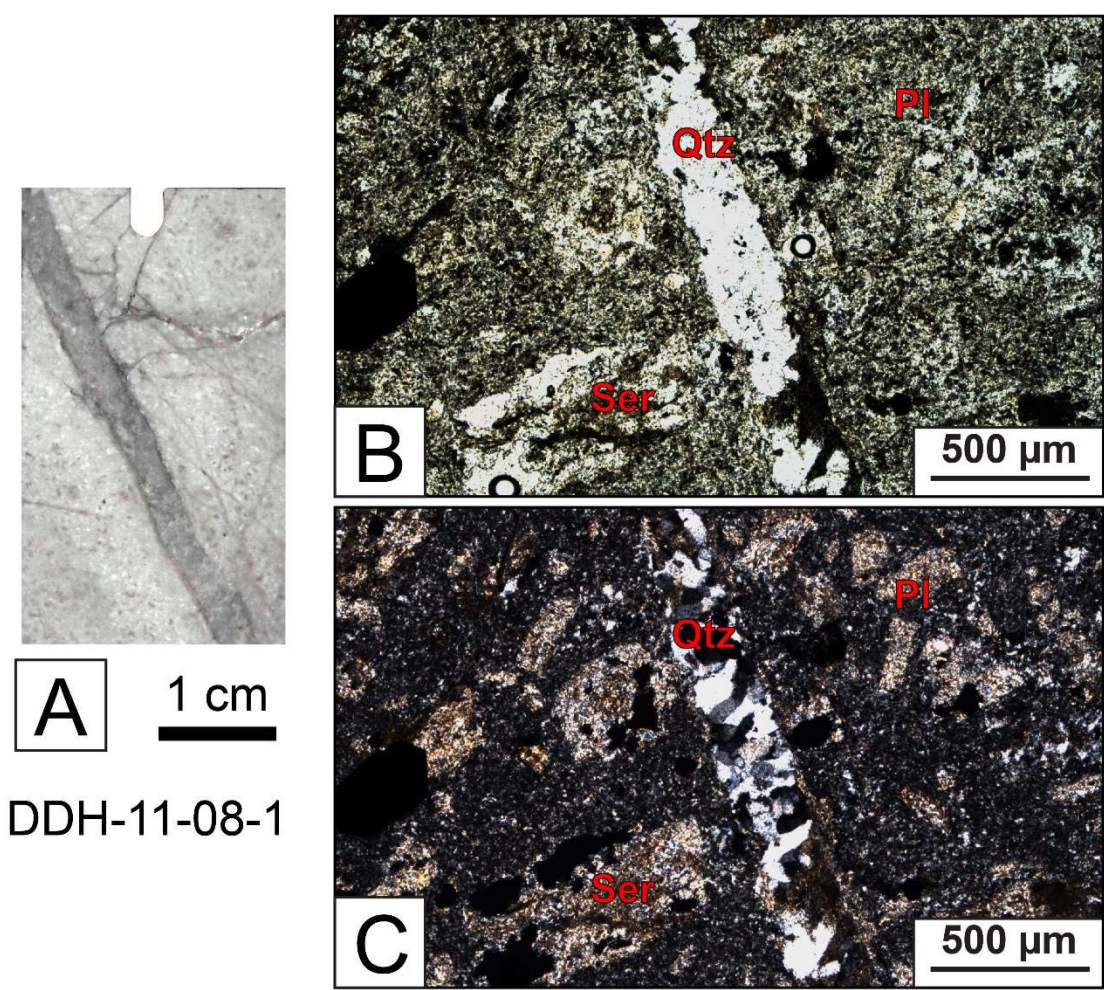

**Figure S32.** Thin section view of DDH-11-08-1, a fine- to coarse-grained porphyritic andesite. A) Hand sample from which thin section was prepared. B) Plane polarized light view. C) Cross polarized light view. Qtz—quartz, Pl—plagioclase, Ser—sericitization.

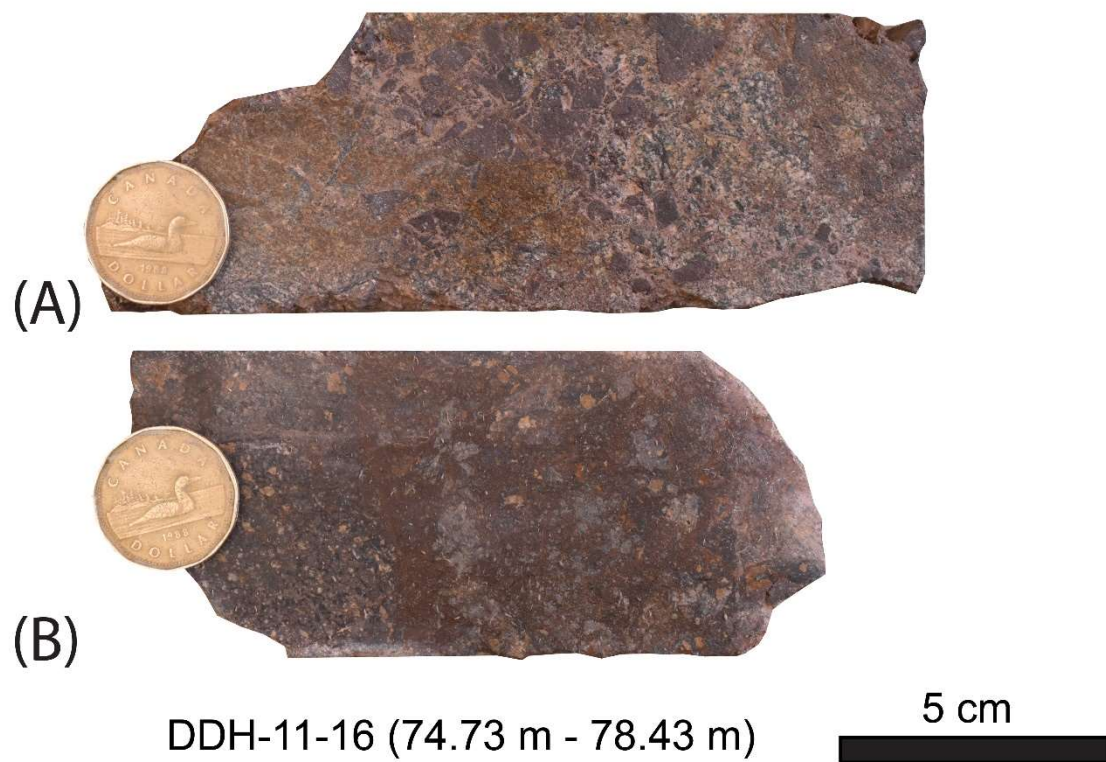

**Figure S33.** DDH-11-16 core samples, identified as fine- to coarse-grained porphyritic andesites, measured for magnetic susceptibility.



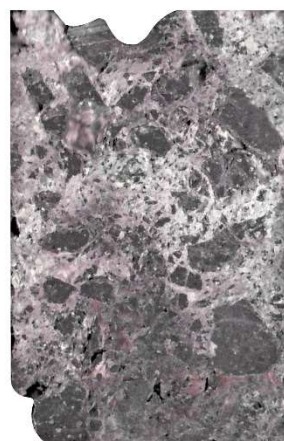

**A** 1 cm

DDH-11-16-1

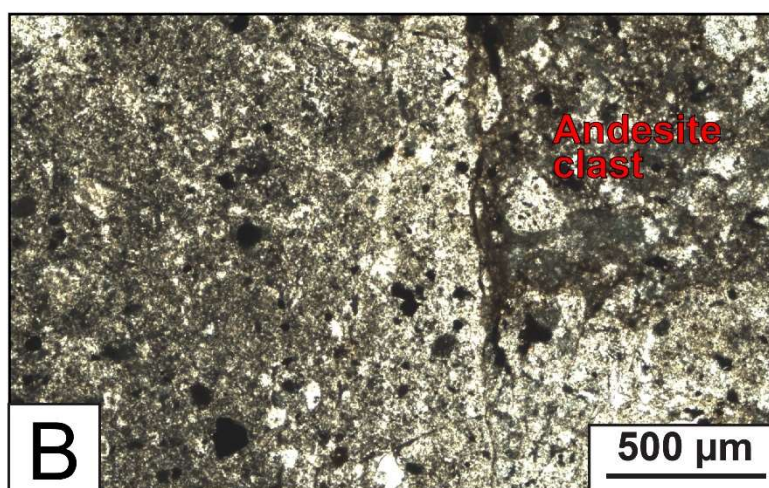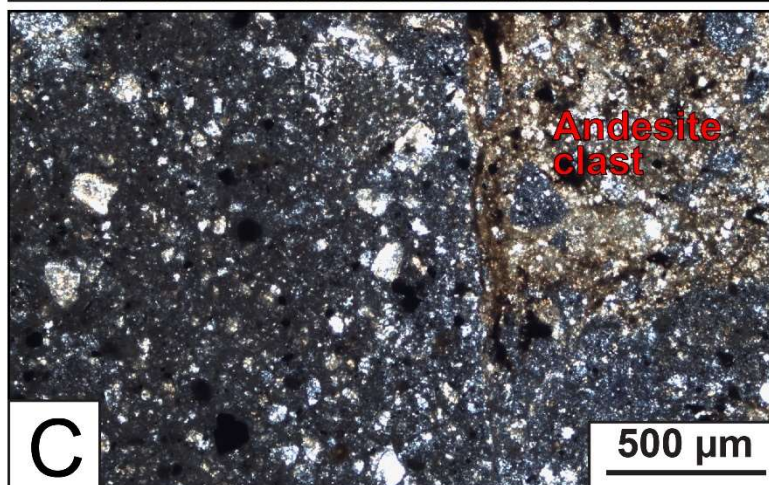

**Figure S34.** Thin section view of DDH-11-16-1, a brecciated fine- to coarse-grained porphyritic andesite. A) Hand sample from which thin section was prepared. B) Plane polarized light view. C) Cross polarized light view.

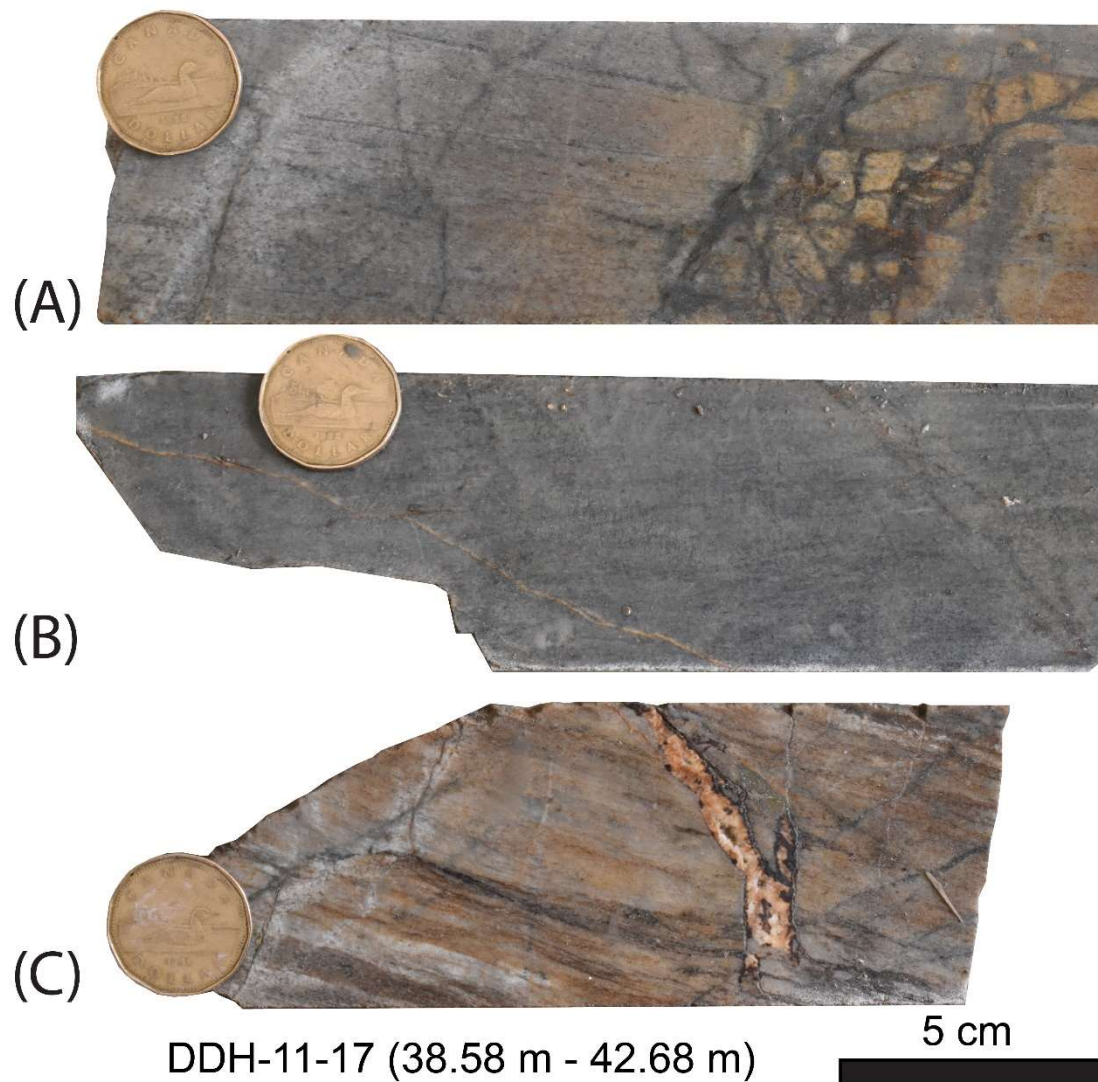

**Figure S35.** DDH-11-17 core samples, identified as fine- to coarse-grained porphyritic andesites, measured for magnetic susceptibility.



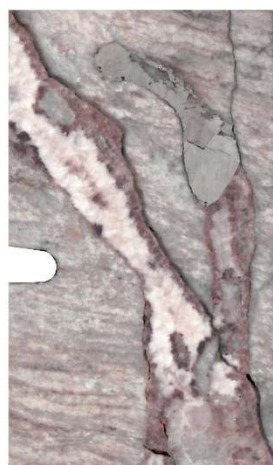

**A** 1 cm

DDH-11-17-1

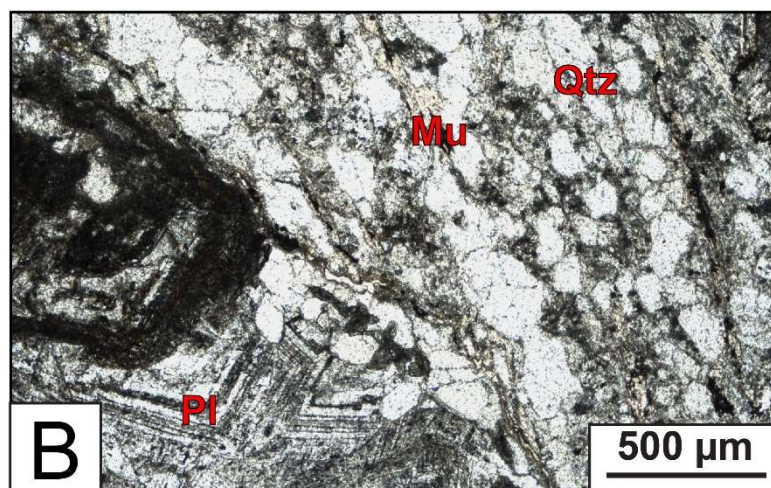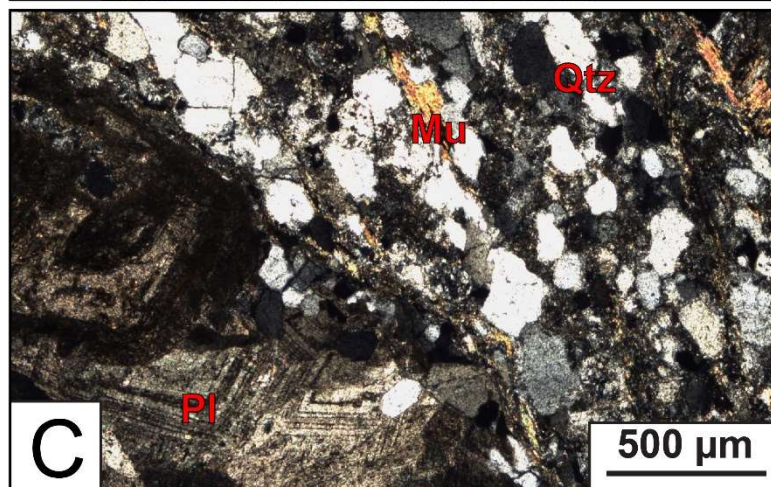

**Figure S36.** Thin section view of DDH-11-17-1, a fine- to coarse-grained porphyritic andesite. A) Hand sample from which thin section was prepared. B) Plane polarized light view. C) Cross polarized light view. Qtz—quartz, Mu—muscovite, Pl—plagioclase.



**Table S1.** Magnetic susceptibility drillhole measurements.

| Drillhole Name | Approximate Depth (m) | Measurements (10 <sup>-3</sup> SI) | Lithology                      | Figure     |
|----------------|-----------------------|------------------------------------|--------------------------------|------------|
| DDH-11-01      | 165.91                | 0.7, 0.9, 0.9                      | Schist                         | Figure 25A |
| DDH-11-01      | 168.15                | 0.7, 0.6, 0.9                      | Schist                         | Figure 25B |
| DDH-11-01      | 169.1                 | 0.5, 0.6, 0.7                      | Schist                         | Figure 25C |
| DDH-11-02      | 131.67                | 1.9, 1.9, 2                        | Chlorite-Mica Schist           | Figure 26A |
| DDH-11-02      | 132.97                | 3.5, 3.5, 4.2                      | Chlorite-Mica Schist           | Figure 26B |
| DDH-11-02      | 134.34                | 2.9, 2.9, 3.2                      | Chlorite-Mica Schist           | Figure 26C |
| DDH-11-02      | 137.78                | 0.5, 0.5, 0.5                      | Chlorite-Mica Schist           | Figure 26D |
| DDH-11-03      | 77.58                 | 0.3, 0.3, 0.3                      | Andesite (Porphyritic)         | Figure 30A |
| DDH-11-03      | 79.53                 | 0.2, 0.2, 0.3                      | Andesite (Porphyritic)         | Figure 30B |
| DDH-11-03      | 80.68                 | 0.2, 0.2, 0.2                      | Andesite (Porphyritic)         | Figure 30C |
| DDH-11-05      | 129.37                | 0.6, 0.6, 0.7                      | Andesite                       | Figure 33A |
| DDH-11-05      | 131.47                | 2.2, 2, 2.3                        | Andesite                       | Figure 33B |
| DDH-11-05      | 254.43                | 0, 0, 0                            | Andesite                       | Figure 34A |
| DDH-11-05      | 255.98                | 0.3, 0.4, 0.4                      | Andesite                       | Figure 34B |
| DDH-11-05      | 256.73                | 0.2, 0.2, 0.2                      | Andesite                       | Figure 34C |
| DDH-11-05      | 257.48                | 1.1, 1.3, 0.9                      | Andesite                       | Figure 34D |
| DDH-11-05      | 258.48                | 0, 0, 0.1                          | Andesite                       | Figure 34E |
| DDH-11-07      | 43.97                 | 0.3, 0.3, 0.3                      | Andesite                       | Figure 35A |
| DDH-11-07      | 45.02                 | 0.4, 0.4, 0.4                      | Andesite                       | Figure 35B |
| DDH-11-07      | 72.99                 | 0.6, 0.5, 0.6                      | Andesite                       | Figure 35C |
| DDH-11-07      | 73.59                 | 0.9, 0.8, 0.6                      | Andesite                       | Figure 35D |
| DDH-11-08      | 191.88                | 0.8, 0.9, 0.9                      | Andesite                       | Figure 36A |
| DDH-11-08      | 192.98                | 1.1, 1.2, 1.1                      | Andesite                       | Figure 36B |
| DDH-11-08      | 193.78                | 0.8, 1, 1.2                        | Andesite                       | Figure 36C |
| DDH-11-08      | 194.33                | 1.5, 1.6, 1.9                      | Andesite                       | Figure 36D |
| DDH-11-08      | 197.28                | 0.6, 0.8, 0.9                      | Andesite                       | Figure 36E |
| DDH-11-10      | 249.14                | 0.3, 0.3, 0.4                      | Quartz-Biotite Schist          | Figure 28A |
| DDH-11-10      | 249.54                | 0.1, 0.2, 0.2                      | Quartz-Biotite Schist          | Figure 28B |
| DDH-11-10      | 249.84                | 0.4, 0.4, 0.4                      | Quartz-Biotite Schist          | Figure 28C |
| DDH-11-15      | 195.59                | 0, 0, 0                            | Muscovite Schist               | Figure 18A |
| DDH-11-15      | 198.5                 | 0.3, 0.3, 0.4                      | Muscovite Schist               | Figure 18B |
| DDH-11-15      | 225.45                | 0.2, 0.2, 0.2                      | Muscovite Schist               | Figure 19A |
| DDH-11-15      | 228.3                 | 0.1, 0.2, 0.3                      | Muscovite Schist               | Figure 19B |
| DDH-11-15      | 229.8                 | 0.2, 0.2, 0.2                      | Muscovite Schist               | Figure 19C |
| DDH-11-15      | 231.15                | 0, 0, 0                            | Muscovite Schist               | Figure 19D |
| DDH-11-15      | 233.6                 | 0.3, 0.2, 0.2                      | Muscovite Schist               | Figure 19E |
| DDH-11-16      | 78.73                 | 1.3, 1.2, 1.3                      | Breccia                        | Figure 40A |
| DDH-11-16      | 79.23                 | 1.1, 1.2, 1.5                      | Breccia                        | Figure 40B |
| DDH-11-17      | 40.73                 | 0.3, 0.3, 0.3                      | Andesite                       | Figure 42A |
| DDH-11-17      | 41.58                 | 0.5, 0.5, 0.5                      | Andesite                       | Figure 42B |
| DDH-11-17      | 42.58                 | 0.9, 0.9, 0.7                      | Andesite                       | Figure 42C |
| DDH-11-18      | 104.52                | 0.2, 0.3, 0.2                      | Quartz-Muscovite Schist        | Figure 17A |
| DDH-11-18      | 105.35                | 0.1, 0.1, 0.1                      | Quartz-Muscovite Schist        | Figure 17B |
| DDH-11-20      | 166.35                | 1.1, 1.2, 1.1                      | Chlorite-Biotite-Quartz Schist | Figure 23A |

|           |        |               |                                    |            |
|-----------|--------|---------------|------------------------------------|------------|
| DDH-11-20 | 167.35 | 0.4, 0.4, 0.5 | Chlorite-Biotite-<br>Quartz Schist | Figure 23B |
| DDH-11-20 | 167.55 | 1.2, 1.2, 1.3 | Chlorite-Biotite-<br>Quartz Schist | Figure 23C |
| DDH-11-20 | 168.38 | 0.2, 0.3, 0.4 | Chlorite-Biotite-<br>Quartz Schist | Figure 23D |
| DDH-11-20 | 169.82 | 0.3, 0.4, 0.3 | Chlorite-Biotite-<br>Quartz Schist | Figure 23E |

**Table S2.** Selected Gold Assay results in the Sixtymile district.

| Drill Hole | Easting | Northing | From (m) | To (m)      | Length (m) | Au (g/t) |
|------------|---------|----------|----------|-------------|------------|----------|
| SM21-09    | 506724  | 7097078  | 38.1     | 60.96 (EOH) | 22.8       | 0.38     |
|            |         |          | 56.4     | 60.96       | 4.57       | 1.04     |
| SM21-10    | 506733  | 7097114  | 26       | 30.57       | 4.57       | 0.22     |
|            |         |          | 50.3     | 60.97 (EOH) | 10.67      | 0.74     |
| SM21-11    | 506681  | 7097066  | 16.7     | 42.6        | 25.9       | 0.35     |
|            |         |          | 16.7     | 22.9        | 6.1        | 1.02     |
|            |         |          | 57.9     | 61          | 3.1        | 0.46     |
| SM21-12    | 506702  | 7097085  | 6.1      | 36.6        | 33.5       | 0.45     |
|            |         |          | 22.9     | 24.4        | 7.6        | 1.02     |
|            |         |          | 54.9     | 61 (EOH)    | 6.1        | 0.75     |
| DDH-10-01  | 506687  | 7097093  | 10       | 32          | 22         | 0.44     |
|            |         |          | 10.67    | 17.8        | 7.13       | 0.76     |
|            |         |          | 187      | 196.8       | 9.8        | 0.99     |
| DDH-10-02  | 506734  | 7097073  | 35       | 75.8        | 40.8       | 0.63     |
|            |         |          | 41.15    | 43.28       | 1.5        | 12.7     |
|            |         |          | 235      | 247.7       | 12.7       | 0.38     |
| DDH-10-03  | 506779  | 7097167  | 35       | 45.7        | 10.7       | 0.45     |
|            |         |          | 36.6     | 38.1        | 1.5        | 1.2      |
|            |         |          | 58       | 63.6        | 5.6        | 0.66     |
|            |         |          | 203      | 208         | 5          | 0.57     |
|            |         |          | 243      | 250.6       | 7.6        | 0.5      |
| DDH 11-15  | 506727  | 7097076  | 192      | 196.5       | 4.5        | 1.03     |
|            |         |          | 232      | 249.9       | 17.9       | 0.5      |
|            |         |          | 234      | 238         | 4          | 1.1      |
| DDH 11-18  | 506465  | 7097260  | 106      | 193         | 87         | 0.69     |
|            |         |          | 141.93   | 155         | 13.07      | 2.43     |

\*Intercepts were partially re-assayed in 2020 with metallic screen. Intercepts are calculated using updated metallic screen and historical results.

\*EOH = end of hole

\*Samples for assay data were taken from historical drilling and June 2021 RAB drilling
